1 Control iPSC lines with clinically annotated genetic variants for versatile multi-lineage  
2 differentiation

3 Running Title: Personal Genome Project Canada iPSC Resource

4 Matthew R Hildebrandt<sup>1\*</sup>, Miriam S Reuter<sup>2,3\*</sup>, Wei Wei<sup>1</sup>, Naeimeh Tayebi<sup>2</sup>, Jiajie  
5 Liu<sup>1</sup>, Sazia Sharmin<sup>1</sup>, Jaap Mulder<sup>1</sup>, L Stephen Lesperance<sup>4</sup>, Patrick M Brauer<sup>5</sup>,  
6 Caroline Kinnear<sup>2</sup>, Alina Piekna<sup>1</sup>, Asli Romm<sup>1</sup>, Jennifer Howe<sup>2,3</sup>, Peter Pasceri<sup>1</sup>,  
7 Rebecca S Mok<sup>1,6</sup>, Guoliang Meng<sup>1</sup>, Matthew Rozycki<sup>1</sup>, Deivid de Carvalho  
8 Rodrigues<sup>1</sup>, Elisa C Martinez<sup>5</sup>, Michael J Szego<sup>7,8,9,10</sup>, Juan Carlos Zúñiga-  
9 Pflücker<sup>5</sup>, Michele K Anderson<sup>5</sup>, Steven A Prescott<sup>4,11,12</sup>, Norman D  
10 Rosenblum<sup>1,13</sup>, Binita M Kamath<sup>1,6</sup>, Seema Mital<sup>2,13</sup>, Stephen W Scherer<sup>2,3,6,14‡</sup>,  
11 James Ellis<sup>1,6‡</sup>

12

- 13 1. Developmental and Stem Cell Biology, The Hospital for Sick Children, Toronto  
14 ON, Canada  
15 2. Genetics and Genome Biology, The Hospital for Sick Children, Toronto, ON,  
16 Canada  
17 3. The Centre for Applied Genomics, The Hospital for Sick Children, Toronto, ON,  
18 Canada  
19 4. Neurosciences and Mental Health, The Hospital for Sick Children, Toronto, ON,  
20 Canada  
21 5. Department of Immunology, University of Toronto, Sunnybrook Research  
22 Institute, Toronto, ON, Canada  
23 6. Department of Molecular Genetics, University of Toronto, Toronto, ON, Canada  
24 7. Dalla Lana School of Public Health, University of Toronto, Toronto, ON, Canada  
25 8. Department of Family and Community Medicine, University of Toronto, Toronto,  
26 ON, Canada  
27 9. The Joint Centre for Bioethics, University of Toronto, Toronto, ON, Canada  
28 10. Unity Health Toronto, Toronto, ON, Canada  
29 11. Institute of Biomaterials and Biomedical Engineering, University of Toronto,  
30 Toronto, ON, Canada  
31 12. Department of Physiology, University of Toronto, Toronto, ON, Canada  
32 13. Department of Pediatrics, University of Toronto, Toronto, ON, Canada  
33 14. McLaughlin Centre, University of Toronto, Toronto, ON, Canada

34 \*Co-first authors ‡Corresponding authors: [jellis@sickkids.ca](mailto:jellis@sickkids.ca) and  
35 [stephen.scherer@sickkids.ca](mailto:stephen.scherer@sickkids.ca)

## 1 Summary

2 Induced Pluripotent Stem Cells (iPSC) derived from healthy individuals are important  
3 controls for disease modeling studies. To create a resource of genetically annotated  
4 iPSCs, we reprogrammed footprint-free lines from four volunteers in the Personal  
5 Genome Project Canada (PGPC). Multilineage directed differentiation efficiently  
6 produced functional cortical neurons, cardiomyocytes and hepatocytes. Pilot users  
7 further demonstrated line versatility by generating kidney organoids, T-lymphocytes and  
8 sensory neurons. A frameshift knockout was introduced into *MYBPC3* and these  
9 cardiomyocytes exhibited the expected hypertrophic phenotype. Whole genome  
10 sequencing (WGS) based annotation of PGPC lines revealed on average 20 coding  
11 variants. Importantly, nearly all annotated PGPC and HipSci lines harboured at least  
12 one pre-existing or acquired variant with cardiac, neurological or other disease  
13 associations. Overall, PGPC lines were efficiently differentiated by multiple users into  
14 cell types found in six tissues for disease modeling, and clinical annotation highlighted  
15 variant-preferred lines for use as unaffected controls in specific disease settings.

## 1 INTRODUCTION

2           The development of induced pluripotent stem cells (iPSC) (Takahashi et al.,  
3 2007; Yu et al., 2007) led to rapid development of many stem cell-based models of  
4 disease (Dimos et al., 2008; Park et al., 2008). Despite exponential growth in the  
5 application of iPSCs across multiple tissue and organ-based systems, there remains no  
6 consistent consensus about which control lines should be used in disease modeling  
7 studies. Over the past decade, choices for control cells have ranged from: 1) human  
8 embryonic stem cells (hESCs) that are considered healthy despite a medical history  
9 being unavailable (Dimos et al., 2008; Marei et al., 2017; Park et al., 2008), 2) iPSCs  
10 from healthy but unrelated individuals (Fernandes et al., 2016; Schwartzentruber et al.,  
11 2018), 3) iPSCs from unaffected family members who may have been phenotyped for  
12 the disease of interest, but with unknown broader health profile (Lan et al., 2013), and  
13 4) isogenic pairs of iPSC lines derived through CRISPR-Cas9 gene editing (Deneault et  
14 al., 2018; Li et al., 2013; Ma et al., 2018; Mosqueira et al., 2018; Wang et al., 2018), or  
15 through non-random X chromosome inactivation status in female cells (Cheung et al.,  
16 2011; Pomp et al., 2011; Tchieu et al., 2010). Hundreds of sources of unrelated and  
17 related healthy iPSC lines exist and are widely available from individual labs, biobanks  
18 and large iPSC-focused consortia such as: HipSci, IPSCORE, Progenitor Cell Biology  
19 Consortium and NextGen (D'Antonio et al., 2017; Panopoulos et al., 2017; Salomonis et  
20 al., 2016; Streeter et al., 2017).

21           Although there are genetically diverse lines to reflect heterogeneity found within  
22 the human population, all control lines are potentially compromised by genetic variants  
23 that may predispose to a phenotype or mask it (DeBoever et al., 2017; Hollingsworth et  
24 al., 2017). To date, disease modeling has focused on penetrant monogenic disorders  
25 that may be relatively unaffected by the presence of concurrent variants (Cheung et al.,  
26 2011; Lan et al., 2013; Li et al., 2013). However, we anticipate an emerging need for  
27 healthy controls with few disease variants as modeling of complex diseases builds  
28 towards assessing the impact of modifier genes or multigenic disorders that may involve  
29 multiple variants as well as noncoding variants in gene regulatory regions.

30           iPSCs carry additional variants compared to donor sequences (D'Antonio et al.,  
31 2018; Gore et al., 2011). This has made apparent the need for whole genome

1 sequencing (WGS) in order to identify the full set of potential disease-susceptibility  
2 variants present in such control lines (Bhutani et al., 2016; Burrows et al., 2016;  
3 D'Antonio et al., 2018; Gore et al., 2011; Kilpinen et al., 2017; Popp et al., 2018).  
4 Although there are some common reprogramming-associated variants (Yoshihara et al.,  
5 2017), most variants appear to be present in the original mosaic source of cells  
6 reprogrammed (Abyzov et al., 2017; Young et al., 2012). Some of these variants could  
7 affect downstream differentiations and baseline phenotypes of differentiated lineages  
8 (Hoekstra et al., 2017). Further, most control lines are recruited for specific studies  
9 limited to a single tissue type or disease, and therefore their versatility for multi-lineage  
10 directed differentiation into many functional cell types required for broad disease  
11 modeling research is not firmly established.

12 One way to limit the presence of potentially confounding variants is to reprogram  
13 cells from selected donors who have minimal variant load. In both the initial Personal  
14 Genome Project (PGP) and Personal Genome Project Canada (PGPC) publications,  
15 one aim was to generate iPSCs that would have extensive genomic characterization  
16 (Ball et al., 2012; Reuter et al., 2018). PGPC genotyped and clinically annotated the  
17 genomes of 56 apparently healthy individuals who consented to disclosure of their  
18 genome sequence and medical traits (Reuter et al., 2018). In addition to comprehensive  
19 annotation of all classes of constitutional genetic variants, these analyses also included  
20 their assessment of the mitochondrial genomes and their pharmacogenetic diplotypes.  
21 All healthy PGPC individuals harbour heterozygous variants of unknown significance in  
22 disease relevant genes, but still had no overt disease phenotype at the time of initial  
23 assessment or at the start of this study. Here we report the iPSC resource generated  
24 from PGPC donors.

25 Our resource comprises multiple iPSC lines derived from two male and two  
26 female donors. One line each from both males and one female was subjected to multi-  
27 lineage directed differentiation into cortical neurons, cardiomyocytes and hepatocytes  
28 representative of the three germ layers. The morphology and function of the resulting  
29 cells were evaluated to assess the versatility of PGPC iPSC lines for *in vitro* studies of  
30 different tissues. To further evaluate the versatility of the resource, we shared the three-  
31 best characterized PGPC lines with pilot users for differentiation into kidney organoids,

1 T-lymphocytes, and sensory neurons. CRISPR gene editing of a known cardiomyopathy  
2 gene created an isogenic pair of lines for modeling a cardiac disorder. As variant  
3 annotation of the donors became available (Reuter et al., 2018), we performed WGS to  
4 search for iPSC line-specific variants that were distinct from donor PGPC blood  
5 variants, and surveyed off-target mutations in the gene edited line.

## 6 RESULTS

### 7 *Isolation and pluripotency characterization of PGPC iPSC lines*

8 We invited PGPC donors to participate in this iPSC study, and selected two male  
9 (PGPC3 and PGPC17) and two female donors (PGPC14 and PGPC1) (Reuter et al.,  
10 2018). We collected peripheral blood to isolate and reprogram CD34+ cells using non-  
11 integrating Sendai viruses. Approximately 120 clones from each donor were picked and  
12 qualitative metrics (colony morphology and low levels of spontaneously differentiated  
13 cells) were used to select lines for characterization. iPSC lines were maintained in  
14 feeder-free conditions and tested for Sendai virus clearance at passage (P)8 to 10.  
15 Sendai virus negative lines were sent for karyotyping between P13-15. At least four  
16 karyotypically normal cell lines were found from each donor with standard  
17 characterization results summarized in Supplemental Table 1 and representative data  
18 shown in Fig. S1. All cell lines stained positive for both cytoplasmic (SSEA4 and TRA-1-  
19 60) and nuclear (POUF51 and NANOG) pluripotency markers (Fig. S1). We tested  
20 functional pluripotency by spontaneously differentiating embryoid bodies followed by  
21 staining for markers of all three germ layers—ectoderm (TUBB3), mesoderm (SMA),  
22 and endoderm (AFP) (Fig. S1). All female lines had skewed X chromosome inactivation  
23 as revealed by androgen receptor assays consistent with preservation of an inactive X  
24 chromosome observed in isogenic female lines (Fig. S1). These data confirm basic  
25 pluripotency status of our resource and cells were expanded and banked at passages  
26 ranging from P14-16.

27 We chose to focus on one cell line from the first three donors for deeper  
28 characterization as PGPC1 was recruited much later. PGPC3\_75, PGPC14\_26, and  
29 PGPC17\_11 were selected for further phenotyping based on qualitative metrics  
30 regarding their growth rate, morphology, and relative low rate of spontaneous  
31 differentiation. RNA sequencing was analyzed online using Pluritest [pluritest.org;

1 (Müller et al., 2011)] and all three lines cluster to the pluripotency quadrant (Fig. S1). As  
2 explained in detail below, we validated the pluripotency and explored the versatility of all  
3 three lines for multi-lineage directed differentiation to excitatory cortical neurons,  
4 cardiomyocytes, and hepatocytes as representatives of cells derived from ectoderm,  
5 mesoderm and endoderm respectively.

6 At this point the WGS data of all the PGPC participants became available and  
7 were annotated for coding variants defined by the American College of Medical  
8 Genetics (ACMG) (Richards et al., 2015). Two heterozygous variants of uncertain  
9 clinical significance (VUS) associated with electrophysiological alterations in cardiac  
10 disease (Table S2) were identified in PGPC3 [TRPM4 (Liu et al., 2010)] and PGPC14  
11 [KCNE2 (Gordon et al., 2008)], respectively. Additional VUSs that could impact  
12 neurologic function were found in cells derived from PGPC14 and PGPC17 (Table S3).  
13 We therefore prioritized PGPC3 as a preferred line for neuronal models and PGPC17  
14 as a variant-preferred line for cardiac models based on their pre-existing variants. The  
15 newest PGPC1 female lines are cardiac variant-preferred and are available only with  
16 donor variant annotation (Table S2) and pluripotency characterization as part of the  
17 resource.

### 18 *Ectodermal differentiation into active cortical neurons*

19 To evaluate PGPC iPSC-derived neurons, we infected PGPC lines and a  
20 previously published control iPSC line (WT37) (Cheung et al., 2011) with lentivirus  
21 bearing doxycycline-inducible *NEUROG2* to generate homogenous populations of  
22 excitatory cortical neurons (Zhang et al., 2013). Neurons were induced with doxycycline  
23 for one week and selected with puromycin and Ara-C (Deneault et al., 2018, 2019) in 6-  
24 well plates then re-seeded to 24-well dishes for morphological analysis in co-cultures  
25 with mouse astrocytes over seven weeks (Fig. 1A). To measure single neurons, we  
26 sparsely labeled six-week cultured neurons by transfection with ubiquitous expressing  
27 GFP plasmid in 2 batches. Neurons were identified by staining with pan-neuronal  
28 marker MAP2 (Fig. 1B). Soma area, dendritic length and neuronal complexity of the  
29 PGPC neurons determined by Sholl analysis were similar to the WT control (Fig. 1C-E).

30 To investigate activity of the variant-preferred PGPC3 neurons, we collected  
31 weekly recordings from 48-well MEA plates (Axion BioSystems) for extracellular

1 electrophysiology measurements (Deneault et al., 2018, 2019) over 6 weeks (weeks 2-  
2 7). Representative raster plots of PGPC3\_75 showed progression of spontaneous  
3 activity at three weeks compared to development of network bursts at 5 and 7 weeks  
4 (Fig. 1F). At the 7 seven-week time point, we observed synchronous firing across  
5 multiple electrodes (minimum 8/16 electrodes) within wells, indicative of neural circuit  
6 formation as measured by network burst frequencies. Neurons displayed weighted  
7 Mean Firing Rates (wMFR) ranging from 5 to 7.5 Hz and network burst frequencies  
8 ranging from 0.1 to 0.35 Hz, which were comparable to or more active (~5 Hz and ~0.1  
9 Hz respectively) than our previously published MEA results from NGN2-derived neurons  
10 (Deneault et al., 2018, 2019). To confirm that recorded activity was due to synaptic  
11 transmission from glutamatergic excitatory neurons, we treated cells with an  $\alpha$ -amino-3-  
12 hydroxy-5-methyl-4-isoxazolepropionic acid (AMPA) receptor inhibitor—6-cyano-7-  
13 nitroquinoxaline-2,3-dione (CNQX)—which abolished network bursting (Fig. 1G).  
14 Network bursting began to recover two hours after washing out CNQX. These findings  
15 demonstrate differentiation of three PGPC lines into sparsely labeled neurons and that  
16 the variant-preferred PGPC3 line was spontaneously active in network circuits.

### 17 *Mesodermal differentiation into contractile cardiomyocytes*

18 PGPC iPSCs were differentiated into cardiomyocytes (CMs) using a STEMdiff  
19 Cardiomyocyte Differentiation Kit (Fig. 2A). We observed beating cells at day 8 with all  
20 lines. Contractile cultures were dissociated to single CMs at D16 for flow cytometry. The  
21 proportion of cardiac troponin T (cTNT) positive cells was routinely between 75-85%  
22 (Fig. 2B). The D16 CMs were re-seeded into 24-well plates and matured for an  
23 additional 17 days to D33. Immunostaining showed that D33 CMs were a mixture of  
24 round and cylindrical shaped cardiomyocytes and most cells positively stained for cTNT,  
25 myosin light chain variant 2 (MLC2V—a ventricular marker), and the sarcomere marker  
26 alpha-actinin (Fig. 2C).

27 For Intracellular  $\text{Ca}^{2+}$  transient measurements in 96 well plates between D31 and  
28 D34, the CMs were loaded with 1  $\mu\text{M}$  Fluo-4 AM dye (Invitrogen) for 30 min at 37°C.  
29 Fluorescence intensity ratios were plotted against time to calculate the  $\text{Ca}^{2+}$  transient  
30 amplitude and rate (Fig. 2D-F). All three PGPC-CMs had similar average beat rates and  
31 amplitudes. To measure contractility of PGPC17\_11 in a complementary method and to

1 determine extracellular electrophysiology, an xCELLigence Real Time Cell Analysis  
2 (RTCA) Cardio ExtraCellular Recording (ECR) system was used. In brief, contracting  
3 CMs in 48-well plates were recorded over 20 second sweeps every three hours for ~25  
4 days after reseeding (Fig. 2G). Contractility of CMs was evaluated via impedance  
5 readouts as beats per minute (bpm) and beating amplitude (BAmp) defined as the cell  
6 index value between lowest and highest points within a beat waveform. Beat rate  
7 averaged 36 bpm (range 32 to 49 bpm) with average amplitude 0.04 arbitrary units (AU)  
8 (range 0.027 to 0.05 AU). Extracellular field potential spike amplitudes defined as the  
9 difference between the lowest and highest recorded voltages ranged from 0.12 to 0.55  
10 mV. These experiments demonstrate differentiation of three PGPC lines into beating  
11 cardiomyocytes and highlight the potential value of using PGPC17 for CRISPR gene  
12 editing for cardiac disease modeling.

### 13 *Endodermal differentiation into enzymatically active hepatocytes*

14 For endodermal differentiation we generated hepatocyte-like cells (HLC) using a  
15 protocol adapted from (Ogawa et al., 2015) (Fig. 3A). Differentiated cells were  
16 characterized at multiple stages to monitor quality and efficiency. At D4, over 95% of  
17 cells co-expressed definitive endoderm (DE) markers *CXCR4* and *cKIT* (data not  
18 shown). DE cells were induced to generate foregut (FG) progenitors as indicated with  
19 the increase in FG markers *FOXA2* and *GATA6* (normalized to iPSCs) compared to DE  
20 (Fig. 3B). FG progenitors were further specified to hepatoblasts (HBs) followed by  
21 maturation to HLCs by D25 where clear upregulation of respective mRNAs was  
22 assessed by qPCR (normalized to fetal liver) (Fig. 3B). Over 95% of HLCs tested  
23 positive via flow cytometry for hepatocyte markers including albumin (ALB), alpha  
24 fetoprotein (AFP), alpha-1-antitrypsin (A1AT), CYP3A7 (Fig. 3C) and further supported  
25 by immunostaining for AFP, ALB, CYP3A7, and HNF4A (Fig. 3D). Measuring functional  
26 activity of HBs (D14) and HLCs (D25) was performed using a p450-glo assay  
27 (Promega). As expected, HLCs had significantly more enzymatic activity of both  
28 CYP3A4 and CYP3A7 as measured by luminescence as compared to HBs. Treatment  
29 with 1  $\mu$ M ketoconazole inhibited enzymatic activity of CYP3A7 to levels observed in  
30 HBs (Fig. 3E). These results demonstrate differentiation of the 3 PGPC lines into  
31 hepatocytes that produce active enzymes.



1 *Utility of the resource – Mesodermal differentiation into kidney organoids and T-cells*

2 To test the utility of PGPC lines as a resource, we made them available to pilot  
3 users. Unlike mono-layer differentiations described above, human kidney organoids are  
4 3D structures generated from iPSCs consisting of multiple cell types and resembling  
5 early embryonic human kidney tissue (Morizane et al., 2015; Taguchi et al., 2014;  
6 Takasato et al., 2015; Wu et al., 2018). Kidney organoids were made from all three  
7 PGPC lines according to the protocol described by Takasato et al., 2015 but with minor  
8 modifications (e.g. feeder-free iPSC culture and omission of conditioned medium)  
9 similar to those implemented in more recent publications (van den Berg et al., 2018;  
10 Forbes et al., 2018) (Fig. S2A).

11 This protocol entailed a 7-day monolayer culture with directed differentiation  
12 towards posterior streak mesoderm (PSM) and subsequently to anterior and posterior  
13 intermediate mesoderm (respectively AIM and PIM). This was accomplished by  
14 applying the canonical WNT-signaling activator, CHIR99021 (CHIR), followed by a  
15 switch to fibroblast growth factor-9 (FGF9) and heparin. Timing of the FGF9/heparin  
16 switch (between D3-5 of differentiation) determined the relative proportion of AIM vs.  
17 PIM and thus, fewer or more nephrons (Takasato et al., 2015). For all experiments, we  
18 made this factor switch on D5. During this course, the PSM marker *T* (brachyury) was  
19 transiently induced followed by AIM marker *GATA3* and PIM marker *HOXD11* as  
20 measured by qPCR and expression was normalized to iPSCs at D0 (Fig. 4A). After  
21 seven days of monolayer differentiation, cells were aggregated by centrifugation and  
22 transferred to Transwell membranes. Aggregates were pulsed with CHIR for one hour  
23 and then treated with FGF9/heparin for five additional days. Shortly after aggregation,  
24 cellular reorganization began and resulted in formation of nephron-like structures in  
25 aggregates. mRNA level analysis (normalized to D7 pre-aggregated cells) showed the  
26 induction of markers of different nephron segments, endothelial, and stromal cell  
27 markers in D25 organoids (Fig. 4A). Immunofluorescence imaging of D18 cross-  
28 sections of organoids showed glomerular structures—positive for podocyte marker  
29 Wilms Tumour 1 (WT1)—as well as tubular structures, both proximal—labeled with  
30 lectin (LTL)—and distal—positive for E-Cadherin (ECAD) (Fig. 4B). These results show  
31 3D kidney organoid structures are produced by the 3 PGPC lines.

1 To evaluate the potential to generate hematopoietic stem/progenitor cells  
2 (HSPCs) and T-cells, we compared the PGPC lines to iPSC11 (Alstem Cell  
3 Advancements) in an embryoid body differentiation protocol described by Kennedy et  
4 al., 2012 with feeder-free adaptation (Fig. S2B). All three PGPC lines gave rise to  
5 CD34+ hemogenic endothelial (HE) cells with a similar efficiency as iPSC11 cells (Fig.  
6 4C), which were magnetic-activated cell sorted at D8 (Fig. S2C). PGPC14 and 17 were  
7 most enriched for CD34+ cells, which were then cocultured on OP9-DL4 cells to induce  
8 a T cell differentiation program. Next, multi-colour flow cytometry was used to  
9 simultaneously measure different cell populations at D8+14 and D8+42 to assess the  
10 ability of HE-derived HSPCs to differentiate to T-lymphocytes, a hallmark of definitive  
11 hematopoietic potential (Fig. 4D). At D8+14 (Fig. 4E), early T-lineage progenitor cells  
12 (proT cells marked as CD34+ CD7+) could be observed transitioning to more  
13 differentiated early T-lineage cells (CD34- CD7+), with a subpopulation co-expressing a  
14 pan-T cell marker (CD7+ CD5+). PGPC14 exhibited a prolonged proT stage (70%),  
15 whilst PGPC17 showed a more rapid transition (17%) compared to iPSC11 (53%).  
16 Simultaneous assessment of T-cell markers on culture day 8+42 detected the presence  
17 of double positive (DP) CD4+ CD8+ T-lineage cells, expressing T-cell receptors  
18 (TCR/CD3+). At this time point, the PGPC lines showed similar propensity as iPSC11 to  
19 generate TCR alpha/beta (39-45%) cells, but only PGPC17 produced rare TCR  
20 gamma/delta bearing (0.1%) cells. We conclude that PGPC lines differentiate into HE  
21 cells that develop into T-cells but with different differentiation kinetics that may  
22 require line-specific protocol optimization.

### 23 *Utility of the resource - Sensory neuron protocol optimization and subtype identification*

24 PGPC17\_11 was selected to optimize differentiation into peripheral sensory  
25 neurons (PSNs) using a small molecule inhibitor protocol adapted from (Chambers et  
26 al., 2012) (Fig. 5A). We found improved growth and survival with the addition of NGF at  
27 D2 and using N2 media with the following composition: 47.5% DMEM/F12, 47.5%  
28 neurobasal, 2% B-27 supplement, 1% N2 supplement, 1% glutamax and 1% Pen/Strep  
29 (full methods described in supplemental experimental methods). Whole cell patch clamp  
30 recordings were used to assess excitability. At two weeks post-induction, all PSNs  
31 responded to sustained current injection with transient spiking but, by four weeks, half

1 the neurons had switched to repetitive spiking (Fig. 5B). The action potential waveform  
2 also experienced significant changes, which included an increase in amplitude (Fig. 5C)  
3 and a decrease in width (Fig. 5D) amongst both transient and repetitive spiking 4-week  
4 old neurons compared with 2-week old neurons. Amongst 4-week old neurons,  
5 repetitive spiking neurons had a significantly lower rheobase (current threshold) than  
6 transient spiking neurons (Fig. 5E). Additional membrane properties are described in  
7 Fig. S3A-F

8 To further characterize phenotype, we imaged the  $\text{Ca}^{2+}$  responses evoked by  
9 brief application of various agonists. Neurons exhibiting a robust  $\text{Ca}^{2+}$  response to KCl  
10 application were considered healthy and their responses to capsaicin, GABA, and ATP  
11 were tested (Fig. 5F). At two weeks post-induction, 44.6% of neurons responded to the  
12 TrpV1 agonist capsaicin, but that number fell to 10% by week four ( $p < 0.00001$ ). TrpV1  
13 is a marker of peptidergic nociceptors, but is broadly expressed among immature PSNs  
14 and is developmentally downregulated (Cavanaugh et al., 2011). Our data suggest that  
15 iPSC-derived PSNs follow a similar developmental program. Low TrpV1 expression at  
16 four weeks suggests that repetitive spiking PSNs represent predominantly non-  
17 peptidergic nociceptors (Zeisel et al., 2018), whereas the transient spiking neurons are  
18 most likely mechanoreceptors. The proportion of neurons responsive to GABA  
19 increased over time ( $p = 0.0001$ ), as did the proportion responsive to the purinergic  
20 receptor agonist ATP ( $p = 0.042$ ). These results demonstrate that PGPC17 was  
21 successfully differentiated into active neurons with a non-peptidergic nociceptor or  
22 mechanoreceptor phenotype.

### 23 *Utility of the resource - WGS analysis*

24 To identify iPSC-specific variants we obtained whole genome sequences of each  
25 PGPC line to compare to their respective donor blood sequences (Table 1). On  
26 average, we identified 1,462 novel nucleotide variants [range: 1,169-1,981] and 0.3  
27 novel copy number variants [range: 0-1] per clone. Twenty variants [range: 18-23]  
28 affected exonic regions: 13 were non-synonymous [range: 12-14] and 1.3 loss-of-  
29 function [range: 1-2]. One likely pathogenic *TP53* variant (Arg158His) was called in  
30 PGPC3\_75 at low allelic fraction (4/22 reads), compatible with mosaicism (Table S2).

1 We did not identify any other known pathogenic sequence variants in reprogrammed  
2 cell lines. Three loss-of-function variants, although not associated with human disease,  
3 were in genes with high haploinsufficiency scores and known function in embryonic  
4 development (PGPC14\_26: *TRIM71* and *FRMD4A*, PGPC17\_11: *ROBO2*, Table S3).  
5 For PGPC14\_26, we also identified an intronic 16-kb-deletion of uncertain significance  
6 in *IL1RAPL1*, a gene associated with impaired synaptogenesis and neurodevelopmental  
7 deficits. Annotation of the PGP donor and cell-line derivative sequences will be  
8 important as variant databases mature (Costain et al., 2018).

### 9 *Utility of the resource-CRISPR/Cas9 gene editing and phenotyping*

10 To edit a gene for cardiac phenotyping, we targeted a region of *MYBPC3* where  
11 frameshifts are associated with hypertrophic cardiomyopathy by using guide (g)RNAs  
12 for CRISPR-Cas9 directed non-homologous end-joining. We nucleofected PGPC17\_11  
13 iPSCs with a pSpCas9(BB)-2A-Puro vector containing gRNA sequences targeting  
14 *MYBPC3* (Fig 6A). Transfected cells were selected with puromycin treatment and  
15 resistant colonies were isolated and expanded. A karyotypically normal sub-clone  
16 bearing an apparent homozygous frameshift mutation was identified in the  
17 *MYBPC3\_KO* line by Sanger sequencing (Fig. 6A/B). To characterize genetic changes,  
18 we performed WGS. On-target compound heterozygote *MYBPC3* frameshifts were  
19 shown to be an 8-bp insertion at chr11:47,359,282insGTGCAGGA, and a large >260 bp  
20 insertion at the same position in the other allele. This insertion did not map to the  
21 human genome and was not detected using our PCR-based sequencing due to the size  
22 of the insertion. To characterize potential off-target effects in the *MYBPC3\_KO* cells, we  
23 first used benchling.com's prediction tool to identify the top 49 off-target sites. We  
24 searched 100 base-pairs up and downstream of each predicted site and found zero  
25 novel variants within these regions. When we looked for overall novel genomic variation,  
26 917 new single nucleotide variants and one intergenic 32 kb deletion (chr18:12137685-  
27 12169689) were found (Table 1). None of these variants were likely pathogenic, similar  
28 to our other reported gene edited lines (Deneault et al., 2018, 2019; Zaslavsky et al.,  
29 2019).

30 To examine the consequences of the frameshifts on MYBPC3 protein, we  
31 generated CMs as described in Figure 3 and collected protein lysates from PGPC17

1 parental and *MYBPC3\_KO* iPSC-CMs. Western blots were unable to detect MYBPC3  
2 protein in the KO clone (Fig. 6C). We matured CMs until D36-44 to look for phenotypic  
3 evidence of hypertrophic cardiomyopathy as predicted by loss of MYBPC3. Indeed,  
4 xCELLigence assays detected increased BAmp in the MYBPC3\_KO-CMs compared to  
5 the parental line at D42 (0.08 AU and 0.04 AU respectively) while having similar beat  
6 rates (41 bpm to 36 bpm respectively). Recently, Cohn et al., 2019 generated a  
7 frameshift in *MYBPC3* using cells from the American PGP and observed similar  
8 phenotypes. Our findings demonstrate the utility of PGPC17\_11 for gene editing to  
9 produce isogenic cell lines for cardiac phenotyping.

#### 10 *WGS analysis of publicly available HipSci lines*

11 Since we found that all our iPSC lines have pre-existing and/or novel variants of  
12 potential concern when considering experiments for different lineages, we analyzed  
13 downloaded genome sequencing data of five publicly available HipSci lines suggested  
14 as healthy controls (HPSI0114i.kolf\_2, HPSI0214i.kucg\_2, HPSI0214i.wibj\_2,  
15 HPSI0314i.hoik\_1 and HPSI0314i.sojd\_3). Across all five samples, 89-96% of the  
16 genome was covered at least 20x (quality metrics in Table S4). We interpreted likely  
17 pathogenic variants, loss-of-function constraint gene variants and variants of unknown  
18 significance (VUS) as previously described (Reuter et al., 2018) (Supp. Excel files).

19 Two likely pathogenic variants were found in kolf\_2 and one in sojd\_3 that were  
20 predicted to have clinical relevance if identified in humans and could also affect  
21 experimental assays. kolf\_2 had a substitution of two adjacent nucleotides, disrupting  
22 exon-intron boundaries of one *COL3A1* allele. One variant was within canonical splice  
23 site c.3526-1G>A, and likely to cause out-of-frame exon skipping. If splicing was  
24 preserved, the second nucleotide change would result in a likely pathogenic missense  
25 alteration p.(Gly1176Ser). *COL3A1* haploinsufficiency is associated with dysfunctional  
26 connective tissue, such as in the vascular system, skin, intestine, lung, and uterus, and  
27 causes vascular type (IV) Ehlers-Danlos syndrome. The same kolf\_2 line also  
28 harboured a heterozygous 19-basepair deletion p.(Pro197Hisfs\*12) in *ARID2*. The  
29 variant was likely pathogenic for Coffin-Siris syndrome, a neurodevelopmental disorder  
30 with variable skeletal and organ manifestations. Finally, sojd\_3 harboured a likely  
31 pathogenic heterozygous nonsense variant p.(Gln348\*) in *BCOR*. This X-linked gene

1 encodes a transcriptional corepressor with important functions in early embryonic  
2 development of various tissues (Wamstad et al., 2008). Females with heterozygous  
3 *BCOR* defects may exhibit oculofaciocardiodental syndrome. None of these likely  
4 pathogenic variants had been previously reported, and we cannot determine if they  
5 were present in the donor genomes, or arose during reprogramming, and could  
6 therefore be mosaic. We also identified several loss-of-function variants of uncertain  
7 significance in constrained genes in *hoik\_1* and *kucg\_2*, mostly with known functions in  
8 early development (as in *PTK2*, *ZNF398*, *UBE3C*, *CDC37*, *TNS3*; Table S3) and many  
9 VUS (Supp Excel files). We did not identify pathogenic or likely pathogenic variants in  
10 *wibj\_2* which suggests it is the variant-preferred line amongst this subset.

## 11 DISCUSSION

12 Here we generated a resource of iPSC control lines for use in disease modeling  
13 studies. These cells have the benefit of both annotated genomic variants and  
14 demonstrated multilineage directed differentiation into functional cortical neurons,  
15 cardiomyocytes and hepatocytes. Pilot users showed that the lines can be used to  
16 generate kidney organoids, or T-lymphocytes to identify specific subtypes of active  
17 sensory neurons, and for gene editing which revealed a preliminary phenotype in  
18 isogenic *MYBPC3* KO cardiomyocytes similar to another isogenic pair (Cohn et al.,  
19 2019).

20 Apart from their versatility, the main advantage of these blood-derived footprint-  
21 free lines is the clinical annotation of potentially disease-associated variants that may  
22 impact cellular phenotypes. Variant analysis in the PGPC participants' blood had  
23 revealed heterozygous variants of unknown significance in all individuals (Reuter et al.,  
24 2018). This observation suggests that it may not be possible to isolate universal control  
25 lines and reinforces the importance for WGS in characterizing control lines, especially  
26 as clinical annotation gains precision with ongoing variant discoveries. WGS has the  
27 advantage of allowing detection of coding variants, CNVs and non-coding variants  
28 although the latter have not yet been fully explored in these lines. Knowledge of the  
29 donors' genomes allowed predictions on how to prioritize control lines for use as tissue  
30 specific controls. For example, as PGPC3 and PGPC14 had variants that could

1 predispose to altered cardiac channel function, PGPC17 was deemed to be the  
2 preferred line for the study of cardiac disease. PGPC3 however was preferred for  
3 neurological disorders.

4 WGS has previously determined that iPSC lines have variants that differ from  
5 those in the donor. Our WGS data reveals that the reprogrammed lines have more than  
6 a thousand new SNVs each, whereas only 1 new CNV (15.6 kb) was detected likely due  
7 to prior selection for normal karyotype. Most variants were of uncertain significance,  
8 with three new variants of potential concern in PGPC14\_26 (Table S3). Genome  
9 sequencing of the *MYBPC3* KO line showed more than 900 additional SNVs compared  
10 to the unedited iPSC line. None of the new variants were near potential gRNA cut sites,  
11 suggesting they were not off-target and were indeed de novo mutations. These  
12 analyses highlight that iPSC lines harbor variants of potential concern that are not found  
13 in the donor blood. Moreover, our annotation of 5 healthy control lines from the HipSci  
14 consortium discovered likely pathogenic variants in 2 lines and additional loss-of-  
15 function variants in constrained genes in 2 other lines, leaving only wibj\_2 as a  
16 preferred healthy control line. We propose that clinical annotation of WGS data is an  
17 important quality control measure of iPSC lines, and that its expanded use will identify  
18 additional variant-preferred lines to use as healthy controls for disease modeling.

19 Disease modeling has generally used 2-3 lines from each individual to account  
20 for variability in reprogramming. To account for 1000-2000 novel variants in each line  
21 compared to the parental genome, this study provides another rationale for studying  
22 multiple lines from each individual. With this in mind, we generated a resource of 4-5  
23 iPSC lines each from two males and two females, all with standard pluripotency  
24 characterization available. We additionally performed multilineage directed  
25 differentiation on a single line from three individuals, assuming that single lines from 3-4  
26 individuals can account for inter-individual variability. One highly characterized line is  
27 therefore available from three PGPC participants, and preferred lines are likely to be of  
28 high utility for gene editing studies that compare the phenotype of isogenic cells.  
29 Ultimately, users of the resource will select one or more lines from each PGPC  
30 participant depending on their research strategy.

## 1 EXPERIMENTAL METHODS

2           Reprogramming of PGPC iPSCs was performed under the approval of the  
3 Canadian Institutes of Health Research Stem Cell Oversight Committee, and the  
4 Research Ethics Board of The Hospital for Sick Children, Toronto. Blood cells were  
5 reprogrammed with Sendai virus to deliver reprogramming factors, and iPSCs were  
6 maintained in feeder-free conditions with mTeSR1 (STEMCELL Technologies); see  
7 Supplemental Information. WGS was performed on Illumina HighSeq X and analyzed as  
8 previously described (Reuter, et al. 2018). A vector-based CRISPR/Cas9 approach was  
9 used to mutagenize *MYBPC3*, further described in Supplemental Information. Detailed  
10 descriptions of differentiations, characterizations and functional assays are found in  
11 Supplemental Information. Over expression of NGN2 induced iPSCs to differentiate to  
12 glutamatergic neurons. Extracellular electrophysiology recordings were collected with  
13 an Axion Maestro MEA reader (Axion Biosystems) multi-electrode array as described in  
14 the Supplemental Information. CMs were differentiated using STEMdiff Cardiomyocyte  
15 differentiation kits (STEMCELL Technologies). CM Calcium imaging was captured by  
16 loading cells with Fluo-4 dye and taking images at 4 Hz for 30 seconds. Contractile and  
17 electrical activity was recorded with an xCELLigence RTCA CardioECR (ACEA  
18 Biosciences). HLCs were generated as previously described (Ogawa et al., 2015).  
19 CYP3A4/7 was measured using p450-Glo assay kit (Promega) as per manufacture's  
20 protocol. Kidney organoids were generated as previously described (Takasato et al.,  
21 2015). T-cells were generated as previously described (Kennedy et al., 2012; La Motte-  
22 Mohs et al., 2005). Sensory neurons were generated using a modified method  
23 described in Chambers, et al. 2012. Whole cell electrophysiology recordings where  
24 made at room temperature with an Axopatch 200B (Molecular Devices) from  
25 borosilicate patch electrodes. Ca<sup>2+</sup> imaging was performed on neurons incubated in  
26 Ca<sup>2+</sup> green-1 AM dye (ThermoFisher Scientific) at room temperature. Images were  
27 acquired at 25 Hz using a NeuroCCD-SM256 imaging system (RedShirt Imaging). WGS  
28 datasets are available from EGA (EGAS00001003684) and RNAseq datasets are  
29 available from GEO ([GSE132012](https://www.ncbi.nlm.nih.gov/geo/query/acc.cgi?acc=GSE132012)). iPSC lines are available upon request.

30



## 1 AUTHOR CONTRIBUTIONS

2 M.R.H., M.S.R., S.W.S. and J.E. designed the research project. M.R.H., W.W.,  
3 N.T., J.L., S.S., J.M., L.S.L., P.M.B., A.P., A.R. and G.M. contributed to cell  
4 maintenance, characterization, and differentiation. M.R.H., N.T. and W.W. contributed to  
5 the CRISPR experiments. M.S.R. performed clinical annotation and off-target analyses.  
6 C.K., D.C.R., J.L.H., P.P., R.S.M., M.R., E.C.M.P., and M.J.S. provided technical help.  
7 M.R.H., M.S.R., N.T., J.L., J.M., L.S.L., P.M.B., J.C.Z-P., M.K.A., S.A.P., N.D.R.,  
8 B.M.K., S.M., S.W.S. and J.E. wrote the manuscript with comments from all co-authors.  
9 M.R.H. and J.E. supervised the project. Specific contributions of the co-corresponding  
10 authors: J.C.Z-P. and M.K.A. labs differentiated iPSCs to T-cells and conducted flow  
11 cytometry; S.A.P. lab conducted patch-clamp electrophysiology and Ca<sup>2+</sup> imaging  
12 experiments on sensory neurons; N.D.R. lab differentiated iPSCs to kidney organoids  
13 and performed expression analysis and imaging; B.M.K. lab differentiated iPSCs to  
14 HLCs and performed imaging, expression and enzymatic analysis; S.M. lab performed  
15 CM ICC and Ca<sup>2+</sup> imaging and xCELLigence analysis, S.W.S. lab performed WGS  
16 analysis and annotation; J.E. lab generated iPSCs and differentiated iPSCs to sensory  
17 neurons and CMs for other groups and cortical neurons for imaging and multi-electrode  
18 arrays.

## 19 ACKNOWLEDGEMENTS

20 The research was supported by grants from the McLaughlin Centre (MC-2014-  
21 06) and Ontario Brain Institute Province of Ontario Neurodevelopmental Disorders  
22 Network (J.E., S.W.S.; IDS-11-02), GlaxoSmithKline - Canadian Institute of Health  
23 Research (CIHR) Chair in Genome Sciences (S.W.S.), Ted Rogers Centre for Heart  
24 Research Strategic Innovation grant (J.E. and S.M.), Heart and Stroke Foundation Chair  
25 (S.M.), CIHR Team Grant (B.M.K.; THC-135232), Tier I Canada Research Chair and  
26 CIHR Foundation Grant (N.D.R.; SOP-155609), CIHR Chronic Pain Network-SPOR  
27 (S.A.P. and J.E.; 2017-007), Medicine by Design New Ideas grants (J.E., M.K.A.;  
28 MBDNICL-2017-03 and J.C.Z-P., M.K.A.; C1TPA-2016-20), NSERC RGPIN grant  
29 (M.K.A.; 05333-14), and Fellowship support from SickKids Restructuring award (J.M  
30 and S.S.). We thank B. Thiruvahindrapuram, T. Nalpathamkalam, W.W. Sung, Z. Wang,  
31 and G. Kaur for bioinformatic support; the Centre for Applied Genomics, the SickKids-

1 UHN Flow and Mass Cytometry Facility and the SickKids Imaging Facility for technical  
2 support. The NGN2/rtTA lentiviral constructs were gifts from T.C. Südhof, and we thank  
3 N.N. Kasri and K. Linda for technical advice. We thank the Personal Genome Project  
4 Canada, Cheryl Cytrynbaum, Ny Hoang and Barbara Kellem for genomic data and  
5 collecting samples for reprogramming, and the PGPC blood donors for volunteering to  
6 participate in this research.

7

## 1 REFERENCES

- 2 Abyzov, A., Tomasini, L., Zhou, B., Vasmatzis, N., Coppola, G., Amenduni, M., Pattni,  
3 R., Wilson, M., Gerstein, M., Weissman, S., et al. (2017). One thousand somatic SNVs  
4 per skin fibroblast cell set baseline of mosaic mutational load with patterns that suggest  
5 proliferative origin. *Genome Res.* 27, 512–523.
- 6 Ball, M.P., Thakuria, J. V, Zaranek, A.W., Clegg, T., Rosenbaum, A.M., Wu, X., Angrist,  
7 M., Bhak, J., Bobe, J., Callow, M.J., et al. (2012). A public resource facilitating clinical  
8 use of genomes. *Proc. Natl. Acad. Sci. U. S. A.* 109, 11920–11927.
- 9 van den Berg, C.W., Ritsma, L., Avramut, M.C., Wiersma, L.E., van den Berg, B.M.,  
10 Leuning, D.G., Liewers, E., Koning, M., Vanslambrouck, J.M., Koster, A.J., et al. (2018).  
11 Renal Subcapsular Transplantation of PSC-Derived Kidney Organoids Induces Neo-  
12 vasculogenesis and Significant Glomerular and Tubular Maturation In Vivo. *Stem Cell*  
13 *Reports* 10, 751–765.
- 14 Bhutani, K., Nazor, K.L., Williams, R., Tran, H., Dai, H., Dzakula, Z., Cho, E.H., Pang,  
15 A.W.C., Rao, M., Cao, H., et al. (2016). Whole-genome mutational burden analysis of  
16 three pluripotency induction methods. *Nat. Commun.* 7, 1–8.
- 17 Burrows, C.K., Banovich, N.E., Pavlovic, B.J., Patterson, K., Gallego Romero, I.,  
18 Pritchard, J.K., and Gilad, Y. (2016). Genetic Variation, Not Cell Type of Origin,  
19 Underlies the Majority of Identifiable Regulatory Differences in iPSCs. *PLoS Genet.* 12,  
20 1–18.
- 21 Cavanaugh, D.J., Chesler, A.T., Braz, J.M., Shah, N.M., Julius, D., and Basbaum, A.I.  
22 (2011). Restriction of Transient Receptor Potential Vanilloid-1 to the Peptidergic Subset  
23 of Primary Afferent Neurons Follows Its Developmental Downregulation in  
24 Nonpeptidergic Neurons. *J. Neurosci.* 31, 10119–10127.
- 25 Chambers, S.M., Qi, Y., Mica, Y., Lee, G., Zhang, X.J., Niu, L., Bilslund, J., Cao, L.,  
26 Stevens, E., Whiting, P., et al. (2012). Combined small-molecule inhibition accelerates  
27 developmental timing and converts human pluripotent stem cells into nociceptors. *Nat.*  
28 *Biotechnol.* 30, 715–720.

- 1 Cheung, A.Y.L., Horvath, L.M., Grafodatskaya, D., Pasceri, P., Weksberg, R., Hotta, A.,  
2 Carrel, L., and Ellis, J. (2011). Isolation of MECP2-null Rett Syndrome patient hiPS cells  
3 and isogenic controls through X-chromosome inactivation. *Hum. Mol. Genet.* *20*, 2103–  
4 2115.
- 5 Cohn, R., Thakar, K., Lowe, A., Ladha, F.A., Pettinato, A.M., Romano, R., Meredith, E.,  
6 Chen, Y.-S., Atamanuk, K., Huey, B.D., et al. (2019). A Contraction Stress Model of  
7 Hypertrophic Cardiomyopathy due to Sarcomere Mutations. *Stem Cell Reports* *12*, 71–  
8 83.
- 9 Costain, G., Jobling, R., Walker, S., Reuter, M.S., Snell, M., Bowdin, S., Cohn, R.D.,  
10 Dupuis, L., Hewson, S., Mercimek-Andrews, S., et al. (2018). Periodic reanalysis of  
11 whole-genome sequencing data enhances the diagnostic advantage over standard  
12 clinical genetic testing. *Eur. J. Hum. Genet.* *26*, 740–744.
- 13 D’Antonio, M., Woodruff, G., Nathanson, J.L., D’Antonio-Chronowska, A., Arias, A.,  
14 Matsui, H., Williams, R., Herrera, C., Reyna, S.M., Yeo, G.W., et al. (2017). High-  
15 Throughput and Cost-Effective Characterization of Induced Pluripotent Stem Cells.  
16 *Stem Cell Reports* *8*, 1101–1111.
- 17 D’Antonio, M., Benaglio, P., Jakubosky, D., Greenwald, W.W., Matsui, H., Donovan,  
18 M.K.R., Li, H., Smith, E.N., D’Antonio-Chronowska, A., and Frazer, K.A. (2018). Insights  
19 into the Mutational Burden of Human Induced Pluripotent Stem Cells from an Integrative  
20 Multi-Omics Approach. *Cell Rep.* *24*, 883–894.
- 21 DeBoever, C., Li, H., Jakubosky, D., Benaglio, P., Reyna, J., Olson, K.M., Huang, H.,  
22 Biggs, W., Sandoval, E., D’Antonio, M., et al. (2017). Large-Scale Profiling Reveals the  
23 Influence of Genetic Variation on Gene Expression in Human Induced Pluripotent Stem  
24 Cells. *Cell Stem Cell* *20*, 533–546.
- 25 Deneault, E., White, S.H., Rodrigues, D.C., Ross, P.J., Faheem, M., Zaslavsky, K.,  
26 Wang, Z., Alexandrova, R., Pellicchia, G., Wei, W., et al. (2018). Complete Disruption  
27 of Autism-Susceptibility Genes by Gene Editing Predominantly Reduces Functional  
28 Connectivity of Isogenic Human Neurons. *Stem Cell Reports* *11*, 1211–1225.

- 1 Deneault, E., Faheem, M., White, S.H., Rodrigues, D.C., Sun, S., Wei, W., Piekna, A.,  
2 Thompson, T., Howe, J.L., Chalil, L., et al. (2019). CNTN5-/+or EHMT2-/+human iPSC-  
3 derived neurons from individuals with autism develop hyperactive neuronal networks.  
4 *Elife* 8, 1–26.
- 5 Dimos, J.T., Rodolfa, K.T., Niakan, K.K., Weisenthal, L.M., Mitsumoto, H., Chung, W.,  
6 Croft, G.F., Saphier, G., Leibel, R., Golland, R., et al. (2008). Induced Pluripotent Stem  
7 Cells Generated from Patients with ALS Can Be Differentiated into Motor Neurons.  
8 *Science* 321, 1218–1221.
- 9 Fernandes, H.J.R., Hartfield, E.M., Christian, H.C., Emmanouilidou, E., Zheng, Y.,  
10 Booth, H., Bogetofte, H., Lang, C., Ryan, B.J., Sardi, S.P., et al. (2016). ER Stress and  
11 Autophagic Perturbations Lead to Elevated Extracellular  $\alpha$ -Synuclein in GBA-N370S  
12 Parkinson's iPSC-Derived Dopamine Neurons. *Stem Cell Reports* 6, 342–356.
- 13 Forbes, T.A., Howden, S.E., Lawlor, K., Phipson, B., Maksimovic, J., Hale, L., Wilson,  
14 S., Quinlan, C., Ho, G., Holman, K., et al. (2018). Patient-iPSC-Derived Kidney  
15 Organoids Show Functional Validation of a Ciliopathic Renal Phenotype and Reveal  
16 Underlying Pathogenetic Mechanisms. *Am. J. Hum. Genet.* 102, 816–831.
- 17 Gordon, E., Panaghie, G., Deng, L., Bee, K.J., Roepke, T.K., Krogh-Madsen, T.,  
18 Christini, D.J., Ostrer, H., Basson, C.T., Chung, W., et al. (2008). A KCNE2 mutation in  
19 a patient with cardiac arrhythmia induced by auditory stimuli and serum electrolyte  
20 imbalance. *Cardiovasc. Res.* 77, 98–106.
- 21 Gore, A., Li, Z., Fung, H.-L., Young, J.E., Agarwal, S., Antosiewicz-Bourget, J., Canto,  
22 I., Giorgetti, A., Israel, M.A., Kiskinis, E., et al. (2011). Somatic coding mutations in  
23 human induced pluripotent stem cells. *Nature* 471, 63–67.
- 24 Hoekstra, S.D., Stringer, S., Heine, V.M., and Posthuma, D. (2017). Genetically-  
25 Informed Patient Selection for iPSC Studies of Complex Diseases May Aid in Reducing  
26 Cellular Heterogeneity. *Front. Cell. Neurosci.* 11, 1–8.
- 27 Hollingsworth, E.W., Vaughn, J.E., Orack, J.C., Skinner, C., Khouri, J., Lizarraga, S.B.,  
28 Hester, M.E., Watanabe, F., Kosik, K.S., and Imitola, J. (2017). iPhemap: an atlas of

- 1 phenotype to genotype relationships of human iPSC models of neurological diseases.  
2 EMBO Mol. Med. 9, 1742–1762.
- 3 Kennedy, M., Awong, G., Sturgeon, C.M., Ditadi, A., LaMotte-Mohs, R., Zúñiga-  
4 Pflücker, J.C., and Keller, G. (2012). T lymphocyte potential marks the emergence of  
5 definitive hematopoietic progenitors in human pluripotent stem cell differentiation  
6 cultures. Cell Rep. 2, 1722–1735.
- 7 Kilpinen, H., Goncalves, A., Leha, A., Afzal, V., Alasoo, K., Ashford, S., Bala, S.,  
8 Bensaddek, D., Casale, F.P., Culley, O.J., et al. (2017). Common genetic variation  
9 drives molecular heterogeneity in human iPSCs. Nature 546, 370–375.
- 10 Lan, F., Lee, A.S., Liang, P., Sanchez-Freire, V., Nguyen, P.K., Wang, L., Han, L., Yen,  
11 M., Wang, Y., Sun, N., et al. (2013). Abnormal calcium handling properties underlie  
12 familial hypertrophic cardiomyopathy pathology in patient-specific induced pluripotent  
13 stem cells. Cell Stem Cell 12, 101–113.
- 14 Li, Y., Wang, H., Muffat, J., Cheng, A.W., Orlando, D.A., Lovén, J., Kwok, S.-M.,  
15 Feldman, D.A., Bateup, H.S., Gao, Q., et al. (2013). Global transcriptional and  
16 translational repression in human-embryonic-stem-cell-derived Rett syndrome neurons.  
17 Cell Stem Cell 13, 446–458.
- 18 Liu, H., El Zein, L., Kruse, M., Guinamard, R., Beckmann, A., Bozio, A., Kurtbay, G.,  
19 Mégarbané, A., Ohmert, I., Blaysat, G., et al. (2010). Gain-of-Function Mutations in  
20 *TRPM4* Cause Autosomal Dominant Isolated Cardiac Conduction Disease. Circ.  
21 Cardiovasc. Genet. 3, 374–385.
- 22 Ma, N., Zhang, J.Z., Itzhaki, I., Zhang, S.L., Chen, H., Haddad, F., Kitani, T., Wilson,  
23 K.D., Tian, L., Shrestha, R., et al. (2018). Determining the Pathogenicity of a Genomic  
24 Variant of Uncertain Significance Using CRISPR/Cas9 and Human-Induced Pluripotent  
25 Stem Cells. Circulation 138, 2666–2681.
- 26 Marei, H.E., Althani, A., Lashen, S., Cenciarelli, C., and Hasan, A. (2017). Genetically  
27 unmatched human iPSC and ESC exhibit equivalent gene expression and neuronal  
28 differentiation potential. Sci. Rep. 7, 1–13.

- 1 Morizane, R., Lam, A.Q., Freedman, B.S., Kishi, S., Valerius, M.T., and Bonventre, J. V  
2 (2015). Nephron organoids derived from human pluripotent stem cells model kidney  
3 development and injury. *Nat. Biotechnol.* 33, 1193–1200.
- 4 Mosqueira, D., Mannhardt, I., Bhagwan, J.R., Lis-Slimak, K., Katili, P., Scott, E.,  
5 Hassan, M., Prondzynski, M., Harmer, S.C., Tinker, A., et al. (2018). CRISPR/Cas9  
6 editing in human pluripotent stem cell-cardiomyocytes highlights arrhythmias,  
7 hypocontractility, and energy depletion as potential therapeutic targets for hypertrophic  
8 cardiomyopathy. *Eur. Heart J.* 39, 3879–3892.
- 9 La Motte-Mohs, R.N., Herer, E., and Zúñiga-Pflücker, J.C. (2005). Induction of T-cell  
10 development from human cord blood hematopoietic stem cells by Delta-like 1 in vitro.  
11 *Blood* 105, 1431–1439.
- 12 Müller, F.-J., Schuldt, B.M., Williams, R., Mason, D., Altun, G., Papapetrou, E.P.,  
13 Danner, S., Goldmann, J.E., Herbst, A., Schmidt, N.O., et al. (2011). A bioinformatic  
14 assay for pluripotency in human cells. *Nat. Methods* 8, 315–317.
- 15 Ogawa, M., Ogawa, S., Bear, C.E., Ahmadi, S., Chin, S., Li, B., Grompe, M., Keller, G.,  
16 Kamath, B.M., and Ghanekar, A. (2015). Directed differentiation of cholangiocytes from  
17 human pluripotent stem cells. *Nat. Biotechnol.* 33, 853–861.
- 18 Panopoulos, A.D., D’Antonio, M., Benaglio, P., Williams, R., Hashem, S.I., Schuldt,  
19 B.M., DeBoever, C., Arias, A.D., Garcia, M., Nelson, B.C., et al. (2017). iPSCORE: A  
20 Resource of 222 iPSC Lines Enabling Functional Characterization of Genetic Variation  
21 across a Variety of Cell Types. *Stem Cell Reports* 8, 1086–1100.
- 22 Park, I.-H., Arora, N., Huo, H., Maherali, N., Ahfeldt, T., Shimamura, A., Lensch, M.W.,  
23 Cowan, C., Hochedlinger, K., and Daley, G.Q. (2008). Disease-Specific Induced  
24 Pluripotent Stem Cells. *Cell* 134, 877–886.
- 25 Pomp, O., Dreesen, O., Fong, D., Leong, M., Meller-Pomp, O., Tan, T.T., Zhou, F., and  
26 Colman, A. (2011). Cell Stem Cell Article Unexpected X Chromosome Skewing during  
27 Culture and Reprogramming of Human Somatic Cells Can Be Alleviated by Exogenous  
28 Telomerase. *Stem Cell* 9, 156–165.

- 1 Popp, B., Krumbiegel, M., Grosch, J., Sommer, A., Uebe, S., Kohl, Z., Plötz, S., Farrell,  
2 M., Trautmann, U., Kraus, C., et al. (2018). Need for high-resolution Genetic Analysis in  
3 iPSC: Results and Lessons from the ForIPS Consortium. *Sci. Rep.* 8, 1–14.
- 4 Reuter, M.S., Walker, S., Thiruvahindrapuram, B., Whitney, J., Cohn, I., Sondheimer,  
5 N., Yuen, R.K.C., Trost, B., Paton, T.A., Pereira, S.L., et al. (2018). The Personal  
6 Genome Project Canada: findings from whole genome sequences of the inaugural 56  
7 participants. *Can. Med. Assoc. J.* 190, E126–E136.
- 8 Richards, S., Aziz, N., Bale, S., Bick, D., Das, S., Gastier-Foster, J., Grody, W.W.,  
9 Hegde, M., Lyon, E., Spector, E., et al. (2015). Standards and guidelines for the  
10 interpretation of sequence variants: a joint consensus recommendation of the American  
11 College of Medical Genetics and Genomics and the Association for Molecular  
12 Pathology. *Genet. Med.* 17, 405–423.
- 13 Salomonis, N., Dexheimer, P.J., Omberg, L., Schroll, R., Bush, S., Huo, J., Schriml, L.,  
14 Ho Sui, S., Keddache, M., Mayhew, C., et al. (2016). Integrated Genomic Analysis of  
15 Diverse Induced Pluripotent Stem Cells from the Progenitor Cell Biology Consortium.  
16 *Stem Cell Reports* 7, 110–125.
- 17 Schwartzenuber, J., Foskolou, S., Kilpinen, H., Rodrigues, J., Alasoo, K., Knights, A.J.,  
18 Patel, M., Goncalves, A., Ferreira, R., Benn, C.L., et al. (2018). Molecular and functional  
19 variation in iPSC-derived sensory neurons. *Nat. Genet.* 50, 54–61.
- 20 Streeter, I., Harrison, P.W., Faulconbridge, A., Flicek, P., Parkinson, H., and Clarke, L.  
21 (2017). The human-induced pluripotent stem cell initiative—data resources for cellular  
22 genetics. *Nucleic Acids Res.* 45, D691–D697.
- 23 Taguchi, A., Kaku, Y., Ohmori, T., Sharmin, S., Ogawa, M., Sasaki, H., and  
24 Nishinakamura, R. (2014). Redefining the In Vivo Origin of Metanephric Nephron  
25 Progenitors Enables Generation of Complex Kidney Structures from Pluripotent Stem  
26 Cells. *Cell Stem Cell* 14, 53–67.
- 27 Takahashi, K., Tanabe, K., Ohnuki, M., Narita, M., Ichisaka, T., Tomoda, K., and  
28 Yamanaka, S. (2007). Induction of Pluripotent Stem Cells from Adult Human Fibroblasts



- 1 by Defined Factors. *Cell* 131, 861–872.
- 2 Takasato, M., Er, P.X., Chiu, H.S., Maier, B., Baillie, G.J., Ferguson, C., Parton, R.G.,  
3 Wolvetang, E.J., Roost, M.S., De Sousa Lopes, S.M.C., et al. (2015). Kidney organoids  
4 from human iPS cells contain multiple lineages and model human nephrogenesis.  
5 *Nature* 526, 564–568.
- 6 Tchieu, J., Kuoy, E., Chin, M.H., Trinh, H., Patterson, M., Sherman, S.P., Aimiwu, O.,  
7 Lindgren, A., Hakimian, S., Zack, J.A., et al. (2010). Female human iPS cells retain an  
8 inactive X-chromosome. *Cell Stem Cell* 7, 329–342.
- 9 Wamstad, J.A., Corcoran, C.M., Keating, A.M., and Bardwell, V.J. (2008). Role of the  
10 Transcriptional Corepressor Bcor in Embryonic Stem Cell Differentiation and Early  
11 Embryonic Development. *PLoS One* 3, e2814.
- 12 Wang, Y., Liu, K.I., Sutrisnoh, N.A.B., Srinivasan, H., Zhang, J., Li, J., Zhang, F., Lalith,  
13 C.R.J., Xing, H., Shanmugam, R., et al. (2018). Systematic evaluation of CRISPR-Cas  
14 systems reveals design principles for genome editing in human cells. *Genome Biol.* 19,  
15 1–16.
- 16 Wu, H., Uchimura, K., Donnelly, E.L., Kirita, Y., Morris, S.A., and Humphreys, B.D.  
17 (2018). Comparative Analysis and Refinement of Human PSC-Derived Kidney Organoid  
18 Differentiation with Single-Cell Transcriptomics. *Cell Stem Cell* 23, 869–881.
- 19 Yoshihara, M., Araki, R., Kasama, Y., Sunayama, M., Abe, M., Nishida, K., Kawaji, H.,  
20 Hayashizaki, Y., and Murakawa, Y. (2017). Hotspots of De Novo Point Mutations in  
21 Induced Pluripotent Stem Cells. *Cell Rep.* 21, 308–315.
- 22 Young, M.A., Larson, D.E., Sun, C.-W., George, D.R., Ding, L., Miller, C.A., Lin, L.,  
23 Pawlik, K.M., Chen, K., Fan, X., et al. (2012). Background Mutations in Parental Cells  
24 Account for Most of the Genetic Heterogeneity of Induced Pluripotent Stem Cells. *Cell*  
25 *Stem Cell* 10, 570–582.
- 26 Yu, J., Antosiewicz-Bourget, J., Tian, S., Slukvin, I.I., Ruotti, V., Smuga-Otto, K., Nie, J.,  
27 Thomson, J.A., Frane, J.L., Vodyanik, M.A., et al. (2007). Induced Pluripotent Stem Cell  
28 Lines Derived from Human Somatic Cells. *Science* 318, 1917–1920.

- 1 Zaslavsky, K., Zhang, W.-B., McCready, F.P., Rodrigues, D.C., Deneault, E., Loo, C.,  
2 Zhao, M., Ross, P.J., El Hajjar, J., Romm, A., et al. (2019). SHANK2 mutations  
3 associated with autism spectrum disorder cause hyperconnectivity of human neurons.  
4 *Nat. Neurosci.* 22, 556–564.
- 5 Zeisel, A., Hochgerner, H., Lönnerberg, P., Johnsson, A., Memic, F., van der Zwan, J.,  
6 Häring, M., Braun, E., Borm, L.E., La Manno, G., et al. (2018). Molecular Architecture of  
7 the Mouse Nervous System. *Cell* 174, 999–1014.
- 8 Zhang, Y., Pak, C., Han, Y., Ahlenius, H., Zhang, Z., Chanda, S., Marro, S., Patzke, C.,  
9 Acuna, C., Covy, J., et al. (2013). Rapid single-step induction of functional neurons from  
10 human pluripotent stem cells. *Neuron* 78, 785–798.
- 11
- 12

1 Table 1. Reprogrammed PGPC iPSC lines: Novel genomic variants (overview).

| PGPC3_75               | SNVs/indels |        |                |                  | CNVs |        |
|------------------------|-------------|--------|----------------|------------------|------|--------|
|                        | All         | Exonic | Non-synonymous | Loss-of-function | All  | Exonic |
| Genome-wide            | 1981        |        |                |                  | 0    |        |
| All genes              | 847         | 19     | 12             | 1                | 0    | 0      |
| OMIM genes             | 172         | 3      | 3              | 0                | 0    | 0      |
| Constrained genes*     | 216         | 6      | 5              | 0                | 0    | 0      |
| PGPC14_26              | SNVs/indels |        |                |                  | CNVs |        |
|                        | All         | Exonic | Non-synonymous | Loss-of-function | All  | Exonic |
| Genome-wide            | 1235        |        |                |                  | 1    |        |
| All genes              | 499         | 18     | 13             | 2                | 1    | 0      |
| OMIM genes             | 104         | 3      | 2              | 0                | 1    | 0      |
| Constrained genes*     | 150         | 8      | 8              | 2                | 1    | 0      |
| PGPC17_11              | SNVs/indels |        |                |                  | CNVs |        |
|                        | All         | Exonic | Non-synonymous | Loss-of-function | All  | Exonic |
| Genome-wide            | 1169        |        |                |                  | 0    |        |
| All genes              | 466         | 23     | 14             | 1                | 0    | 0      |
| OMIM genes             | 95          | 6      | 6              | 1                | 0    | 0      |
| Constrained genes*     | 113         | 5      | 5              | 1                | 0    | 0      |
| PGPC17_11<br>MYBPC3_KO | SNVs/indels |        |                |                  | CNVs |        |
|                        | All         | Exonic | Non-synonymous | Loss-of-function | All  | Exonic |
| Genome-wide            | 917         |        |                |                  | 1    |        |
| All genes              | 382         | 17     | 9              | 1                | 0    | 0      |
| OMIM genes             | 85          | 4      | 2              | 0                | 0    | 0      |
| Constrained genes*     | 35          | 7      | 4              | 0                | 0    | 0      |

2 \* pLI>0.9 (<http://exac.broadinstitute.org/>).

3 PGPC3\_75, PGPC14\_26, and PGPC17\_11 were compared to the sequence data  
 4 obtained from whole blood. PGPC17\_11 MYBPC3\_KO was compared to the  
 5 PGPC17\_11 reprogrammed line. Abbreviations: CNV, copy number variant; indel,  
 6 insertion/deletion; SNV, single nucleotide variant.

7

1 **Figure 1. Active neurons generated from PGPC iPSCs display similar dendrite**  
2 **morphology and network circuitry.**

3 (A) Differentiation scheme to generate excitatory cortical neurons by induction of  
4 NGN2. Transduced iPSCs were dissociated to single cells and plated in the presence of  
5 ROCK inhibitor. At D1, media was changed to CM1 and NGN2 was induced by  
6 incubating with doxycycline until D7. Puromycin was added from D2-4 to remove any  
7 non-transduced cells. Culture media was changed to CM2 on D3. Ara-C was added  
8 from D6-8 to remove any remaining dividing cells. On D8, neurons are re-seeded for  
9 downstream assays in BrainPhys media. (B) Representative immunocytochemistry  
10 image of iPSC-derived neurons after six weeks in culture labeled with DAPI and MAP2  
11 and sparsely labeled with GFP (biological replicates = 2; technical replicates =  
12 20). Scale bar represents 100  $\mu$ m). (C-E) Plots of (C) soma area (D) total dendrite  
13 length (E) number of intersections (Sholl analysis) from six-week old neurons (biological  
14 replicates n = 2; technical replicates per batch = 20). (C-D) Box plots indicate median  
15 values. (E) Mean values were plotted with error bars indicating standard error.  
16 Statistically significant pair-wise comparisons indicated by \* are inset. (F-G)  
17 Representative raster plots of PGPC3 neurons from a single well of recordings collected  
18 by micro-electrode arrays at different time points (two biological replicates each with 8  
19 technical replicates). Each spike is indicated by a black line, blue lines represent  
20 bursts defined by at least five spikes each separated by an inter-spike interval of no  
21 more than 100 ms. (G) Bursts are absent after treatment of week 7 neurons with CNQX  
22 (left). Burst begin to return after compound removal and replacement with fresh basal  
23 media (right).

24

25 **Figure 2. PGPC iPSCs differentiate to beating contractile cardiomyocytes.**

26 (A) Differentiation scheme to generate CMs using STEMdiff cardiomyocyte  
27 differentiation kit. iPSCs were dissociated to single cells, plated in 12-well plates, and  
28 allowed to reach 85-90% confluency before beginning differentiation. (B) D16 CMs were  
29 dissociated to single cells for reseeded and a proportion was labeled with anti-cTNT-  
30 FITC and subjected to flow cytometry (biological replicates  $\geq$  3). (C) Representative  
31 images of immunocytochemistry staining of D30 PGPC17 CMs labeled with DAPI, anti-

1 MLC2V (both), and anti-cTNT (left) or anti-alpha actinin (right) (biological replicates = 2).  
2 Scale bars represent 100  $\mu\text{m}$ . (D) Representative traces of spontaneous  $\text{Ca}^{2+}$  transients  
3 of PGPC CMs at D31 measured by relative fluorescence intensity (biological replicates  
4  $n \geq 3$ ; technical replicates per batch  $\geq 2$ ). (E-F) Plots of (E) beat rate and (F)  $\text{Ca}^{2+}$   
5 transient amplitudes. (G) Representative xCELLigence data of D40 PGPC17 CMs  
6 showing impedance changes (BAmp: defined as the cell index value between lowest  
7 and highest points within a beat waveform) reflecting CM beat waveform and absolute  
8 extracellular voltage tracings over a 20 second recording (biological replicates = 3;  
9 technical replicates  $\geq 3$ ).

10

### 11 **Figure 3. Enzymatically active HLCs are generated from PGPC iPSCs.**

12 (A) Hepatocyte-like cell differentiation scheme. iPSCs were dissociated to single cells  
13 and maintained in ROCK inhibitor for 24 hours to support survival. From D1-4 cells are  
14 transferred to STEMdiff Definitive Endoderm (DE) differentiation kit. From D4-8 cells  
15 were switched to serum-free-differentiation (SFD)-based medium with basic fibroblast  
16 growth factor (bFGF) and activin A for 4 days adding B27 without retinoic acid (RA) for  
17 days 5-8. Media was changed every other day, then on D8, cells were switched to low  
18 glucose DMEM supplemented with SB-431542 and bone morphogenic protein (BMP4)  
19 from day 8 to day 14. bFGF was added back to the media during D9-14 while B27 with  
20 retinoic acid was supplemented from D9-25 with media changed every other day. From  
21 D14-25 hepatocyte growth factor (HGF), dexamethasone and oncostatin M (OSM) were  
22 added to culture media. At D21 cells were cultured in a mixture of low glucose DMEM /  
23 Ham's F12 (3:1) media. Bright field images highlight morphology changes during  
24 differentiation. Scale bars represent 100  $\mu\text{m}$ . (B) Heatmaps indicating  $\log_2$  fold change  
25 of marker gene expression normalized to iPSCs (left) or to fetal liver (right) (biological  
26 replicates = 3). (C) Dissociated D25 PGPC14 HLCs were labeled with anti-ALB  
27 and  $\square$  anti-AFP (left) or anti-alpha-1-AT and  $\square$  anti-CYP3A7 (right) and subjected to flow  
28 cytometry (biological replicates = 3). (D) Representative immunocytochemistry images  
29 of D25 PGPC14 HLCs labeled with DAPI and anti-AFP, anti-Albumin, anti-CYP3A7, or  
30 anti-HNF4A (biological replicates = 3). Scale bar represents 100  $\mu\text{m}$ . (E) Log scale plot

1 of luminescence of each cell line measuring P450 enzymatic activity assayed at D14  
2 and D25 with or without ketoconazole as an inhibitor (biological replicates  $n = 3$ ;  
3 technical replicates for untreated samples = 2, treated samples = 1). Statistical  
4 significance was determined by Dunn's test between all samples and \* indicate pairs  
5 where  $p < 0.05$ .

6

#### 7 **Figure 4. Generation of kidney organoids and T-lymphocytes.**

8 (A) Heatmaps indicating  $\log_2$  fold change of marker gene expression normalized to  
9 iPSCs (left) or D7 (right) [biological replicates (PGPC3/17 = 1, PGPC14  $\geq 2$ ); technical  
10 replicates  $\geq 3$ ]. (B) Representative images of immunohistochemistry of kidney organoid  
11 sections labeled with anti-WT1, anti-LTL, and anti-ECAD antibodies (biological  
12 replicates  $\geq 3$  for each line). Scale bar represents 100  $\mu\text{m}$ . (C) Average differentiation  
13 efficiency of iPSC lines after MACS sorting for CD34 (biological replicates = 4; SEM).  
14 (D) T-lymphocyte marker expression during T-cell maturation from CD34+ HE cells. (E)  
15 D8+14 cells were labeled with anti-CD34, anti-CD7 and anti-CD5 antibodies and  
16 analyzed by flow cytometry (biological replicates = 3). (F) D8+42 cells were labeled with  
17 anti-CD4, anti-CD8b, anti-CD3, anti-T-cell receptor alpha/beta, and anti-T-cell receptor  
18 gamma/delta antibodies then analyzed by flow cytometry (biological replicates = 3).

19

#### 20 **Figure 5. PGPC17-derived sensory neurons are predominately non-peptidergic.**

21 (A) Sensory neuron differentiation scheme. The LDN and SB drug combination was  
22 applied between D0 through D5 with the CHIR, DAPT, SU and NGF combination  
23 starting on D2 through D11. Starting on D4, N2 media was added in increasing 25%  
24 increments replacing mTeSR1. Dividing cells were eliminated using Ara-C on D10. N2  
25 media was changed twice weekly thereafter. (B) Representative spiking patterns to  
26 sustained somatic current injection. At 2 weeks, all cells spike transiently (biological  
27 replicates = 3; technical replicates  $\geq 5$ ) whereas at 4 weeks, there is a significant  
28 increase in the proportion of repetitively spiking neurons (biological replicates = 4;  
29 technical replicates  $\geq 2$ ) compared to transiently spiking neurons (biological replicates =

1 4; technical replicates  $\geq 2$ ) ( $p < 0.0001$ , chi square test). The action potential waveform  
2 experienced a significant increase in amplitude (C) and a significant decrease in width  
3 (D) between 2- and 4-weeks post-induction. Rheobase was significantly lower in  
4 repetitive spiking neurons than in transient spiking neurons at 2- or 4-week post-  
5 induction (E). \* shows  $p < 0.05$  based on Mann-Whitney U tests. (F)  $\text{Ca}^{2+}$  revealed a  
6 significant decrease in the proportion of neurons responsive to capsaicin between 2 and  
7 4 weeks ( $< 0.00001$ , chi square test) whereas the proportion of neurons responsive to  
8 GABA ( $p = 0.0001$ ) or ATP ( $p = 0.042$ ) significantly increased.

9

10 **Figure 6. Derivation of *MYBPC3*-knockout iPSC that display a cardiomyopathy**  
11 **phenotype.**

12 (A) Exon 24 of *MYBPC3* was targeted by CRISPR/Cas9 and Sanger sequencing of one  
13 clone PGPC17\_11-*MYBPC3*#4 (hereby identified as *MYBPC3*\_KO) identified an out of  
14 frame insertion resulting in an early stop codon. (B) Normal karyotype was confirmed  
15 before differentiation and characterization. (C) Western blot probing for *MYBPC3* using  
16 iPSC lysate as a negative control and parental CM lysate as a positive control. No full  
17 length or truncated forms of *MYBPC3* were detected on the blot using near infrared  
18 detection. Revert total protein stain was used to show similar amounts of protein were  
19 added to each lane. (D) Representative xCELLigence traces of PGPC17 and *MYBPC3*-  
20 KO CMs showing beat amplitude (cell index) and extracellular voltage recordings over a  
21 20 second sweep at D40 (biological replicates = 2; technical replicates  $\geq 8$ ). *MYBPC3*-  
22 KO CMs showed a higher beat amplitude compared to isogenic control CMs suggestive  
23 of hypercontractility as seen in hypertrophic cardiomyopathy.

24

25

Figure 1

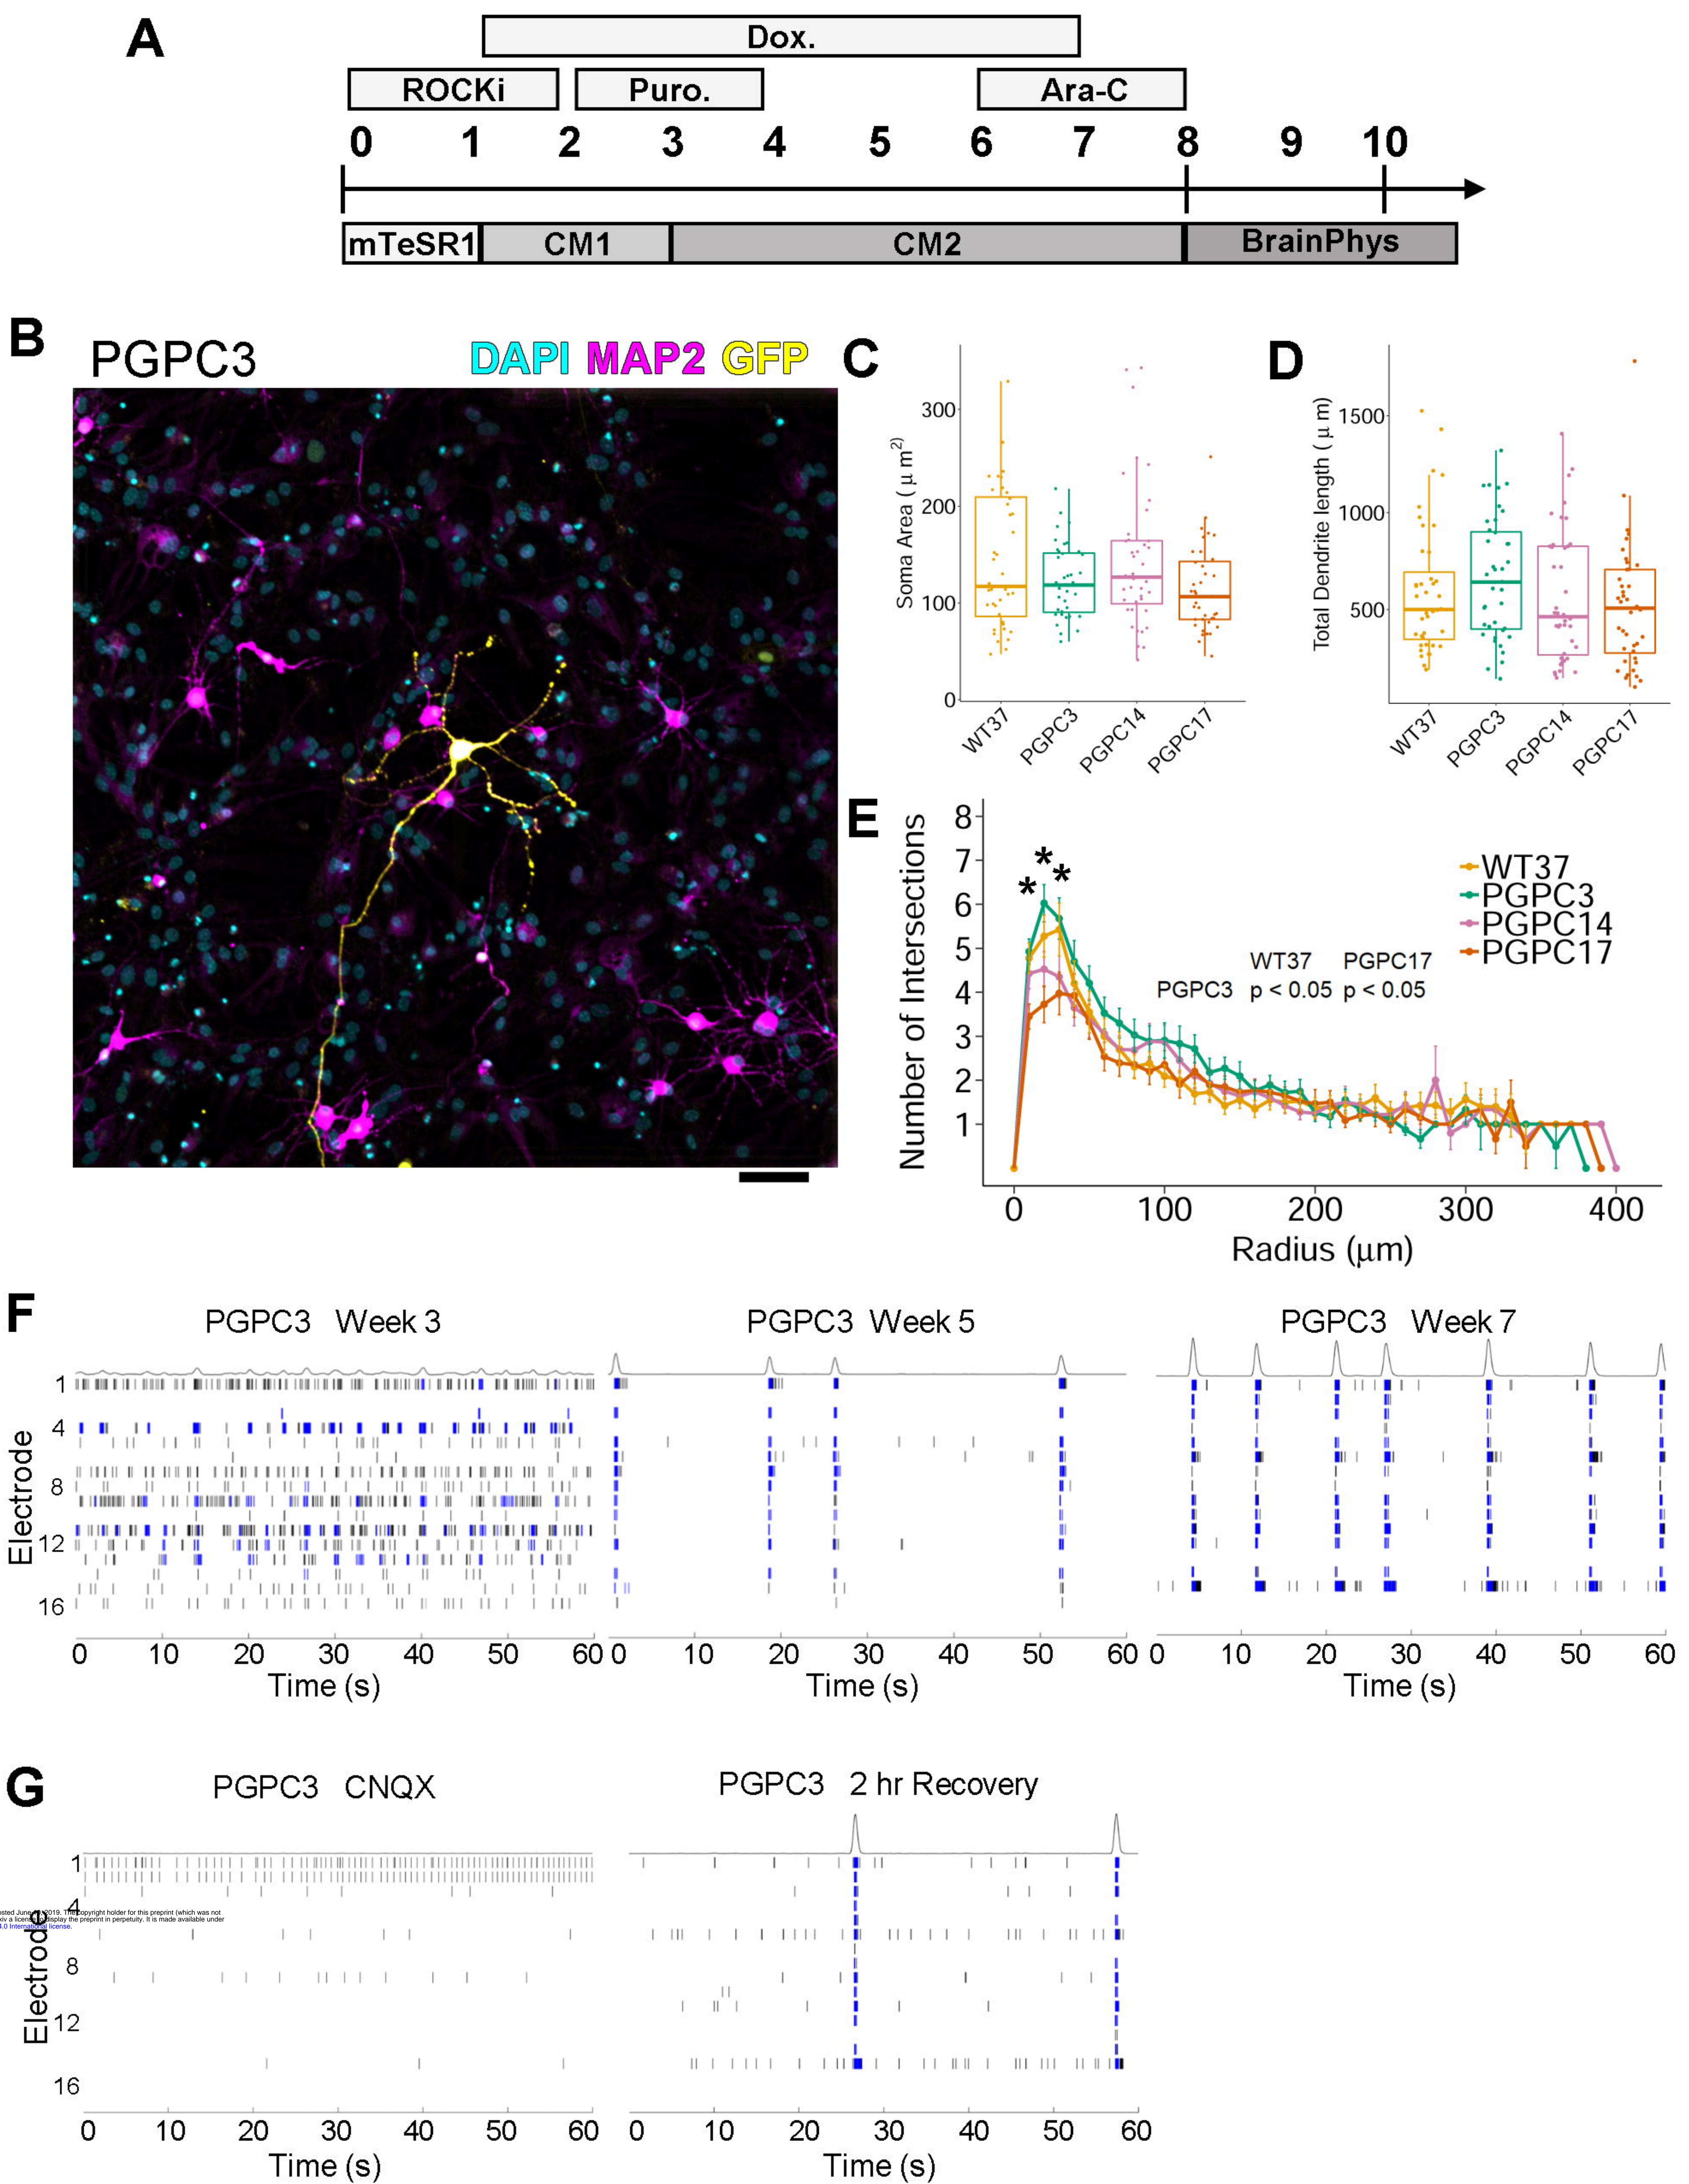



Figure 2

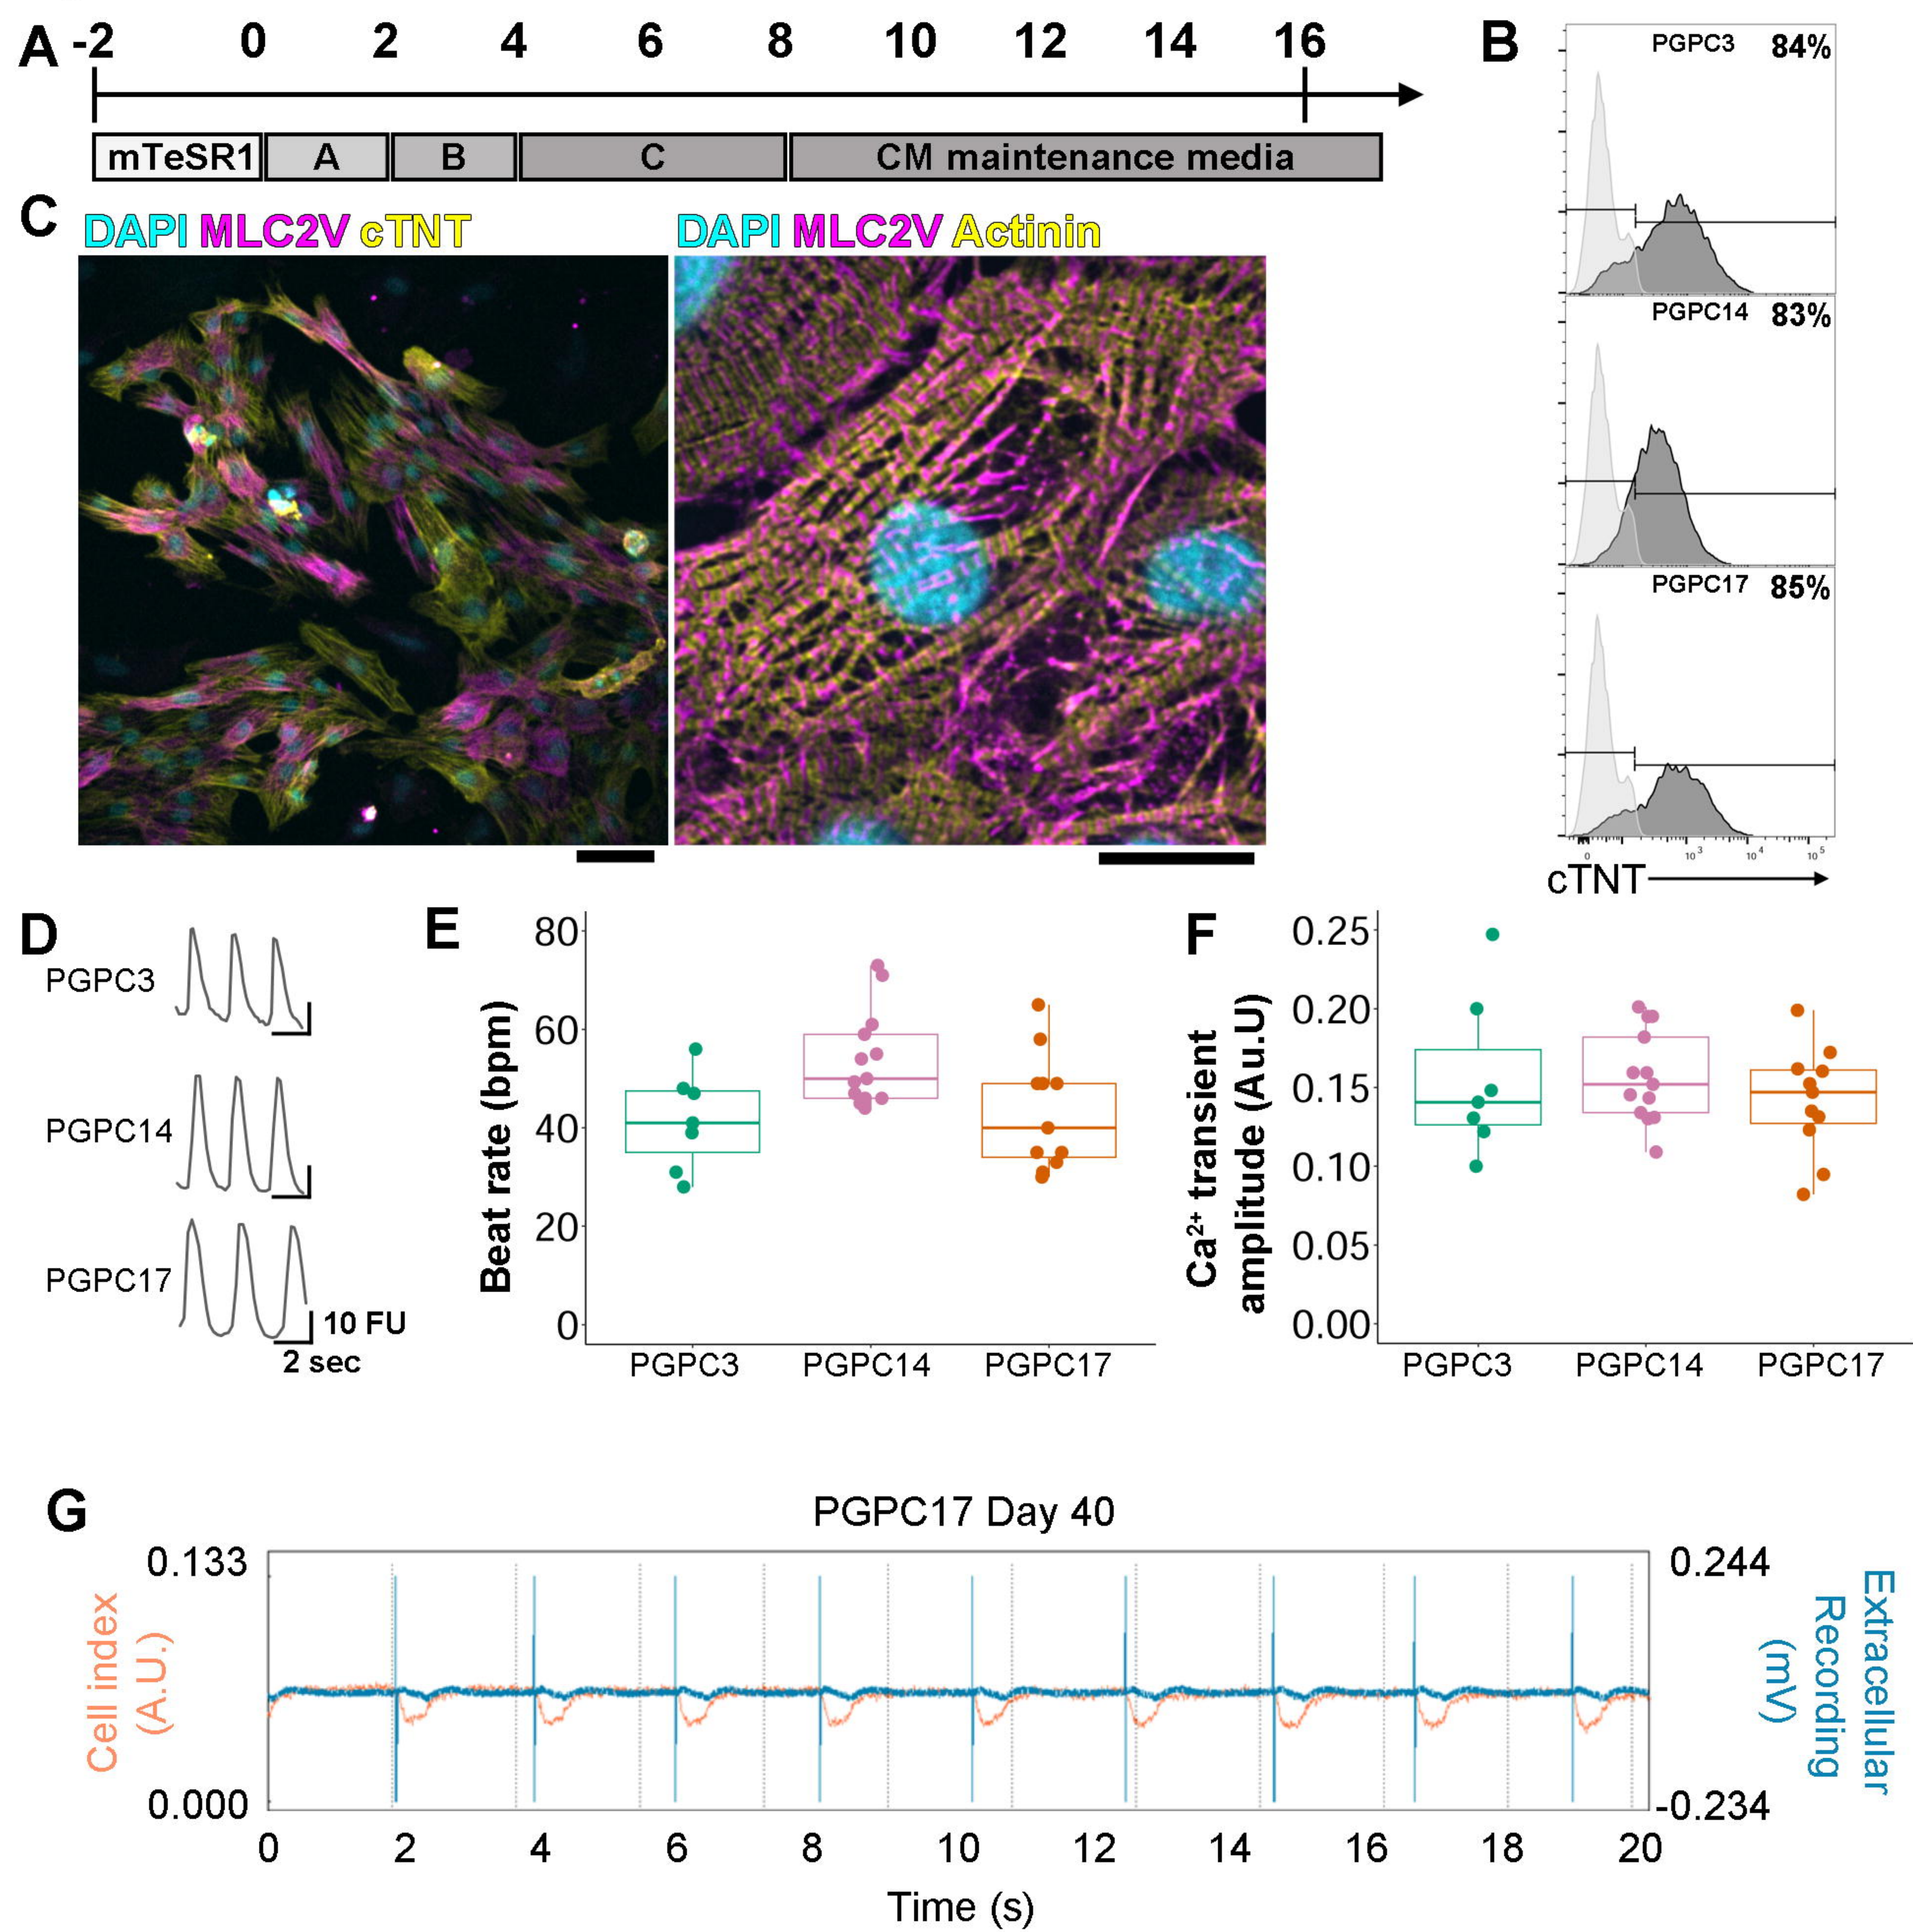

Figure 3

**A**

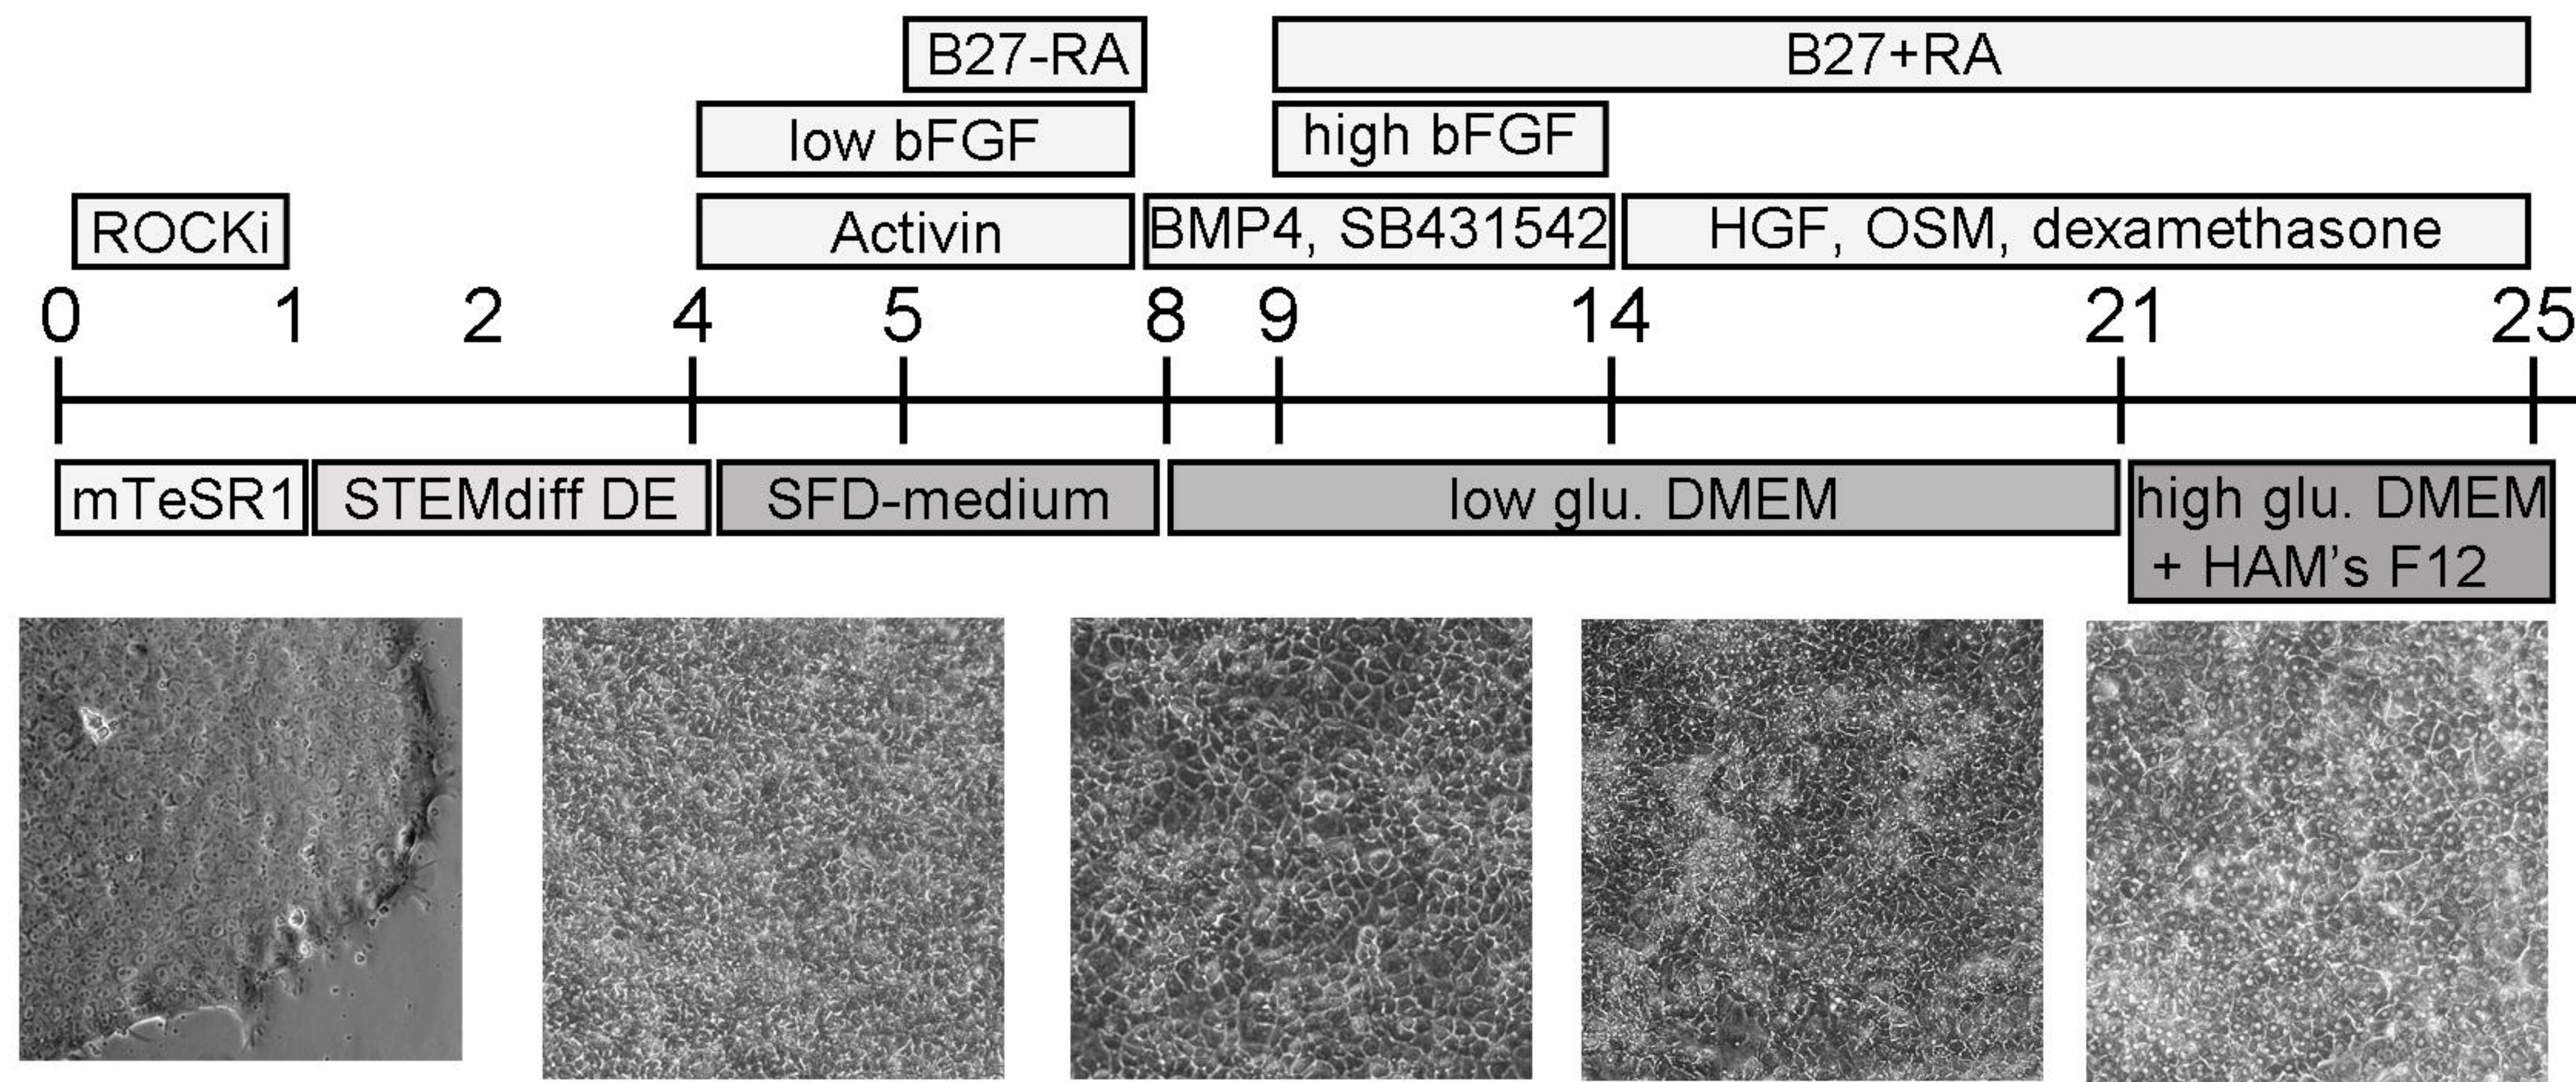

**B**

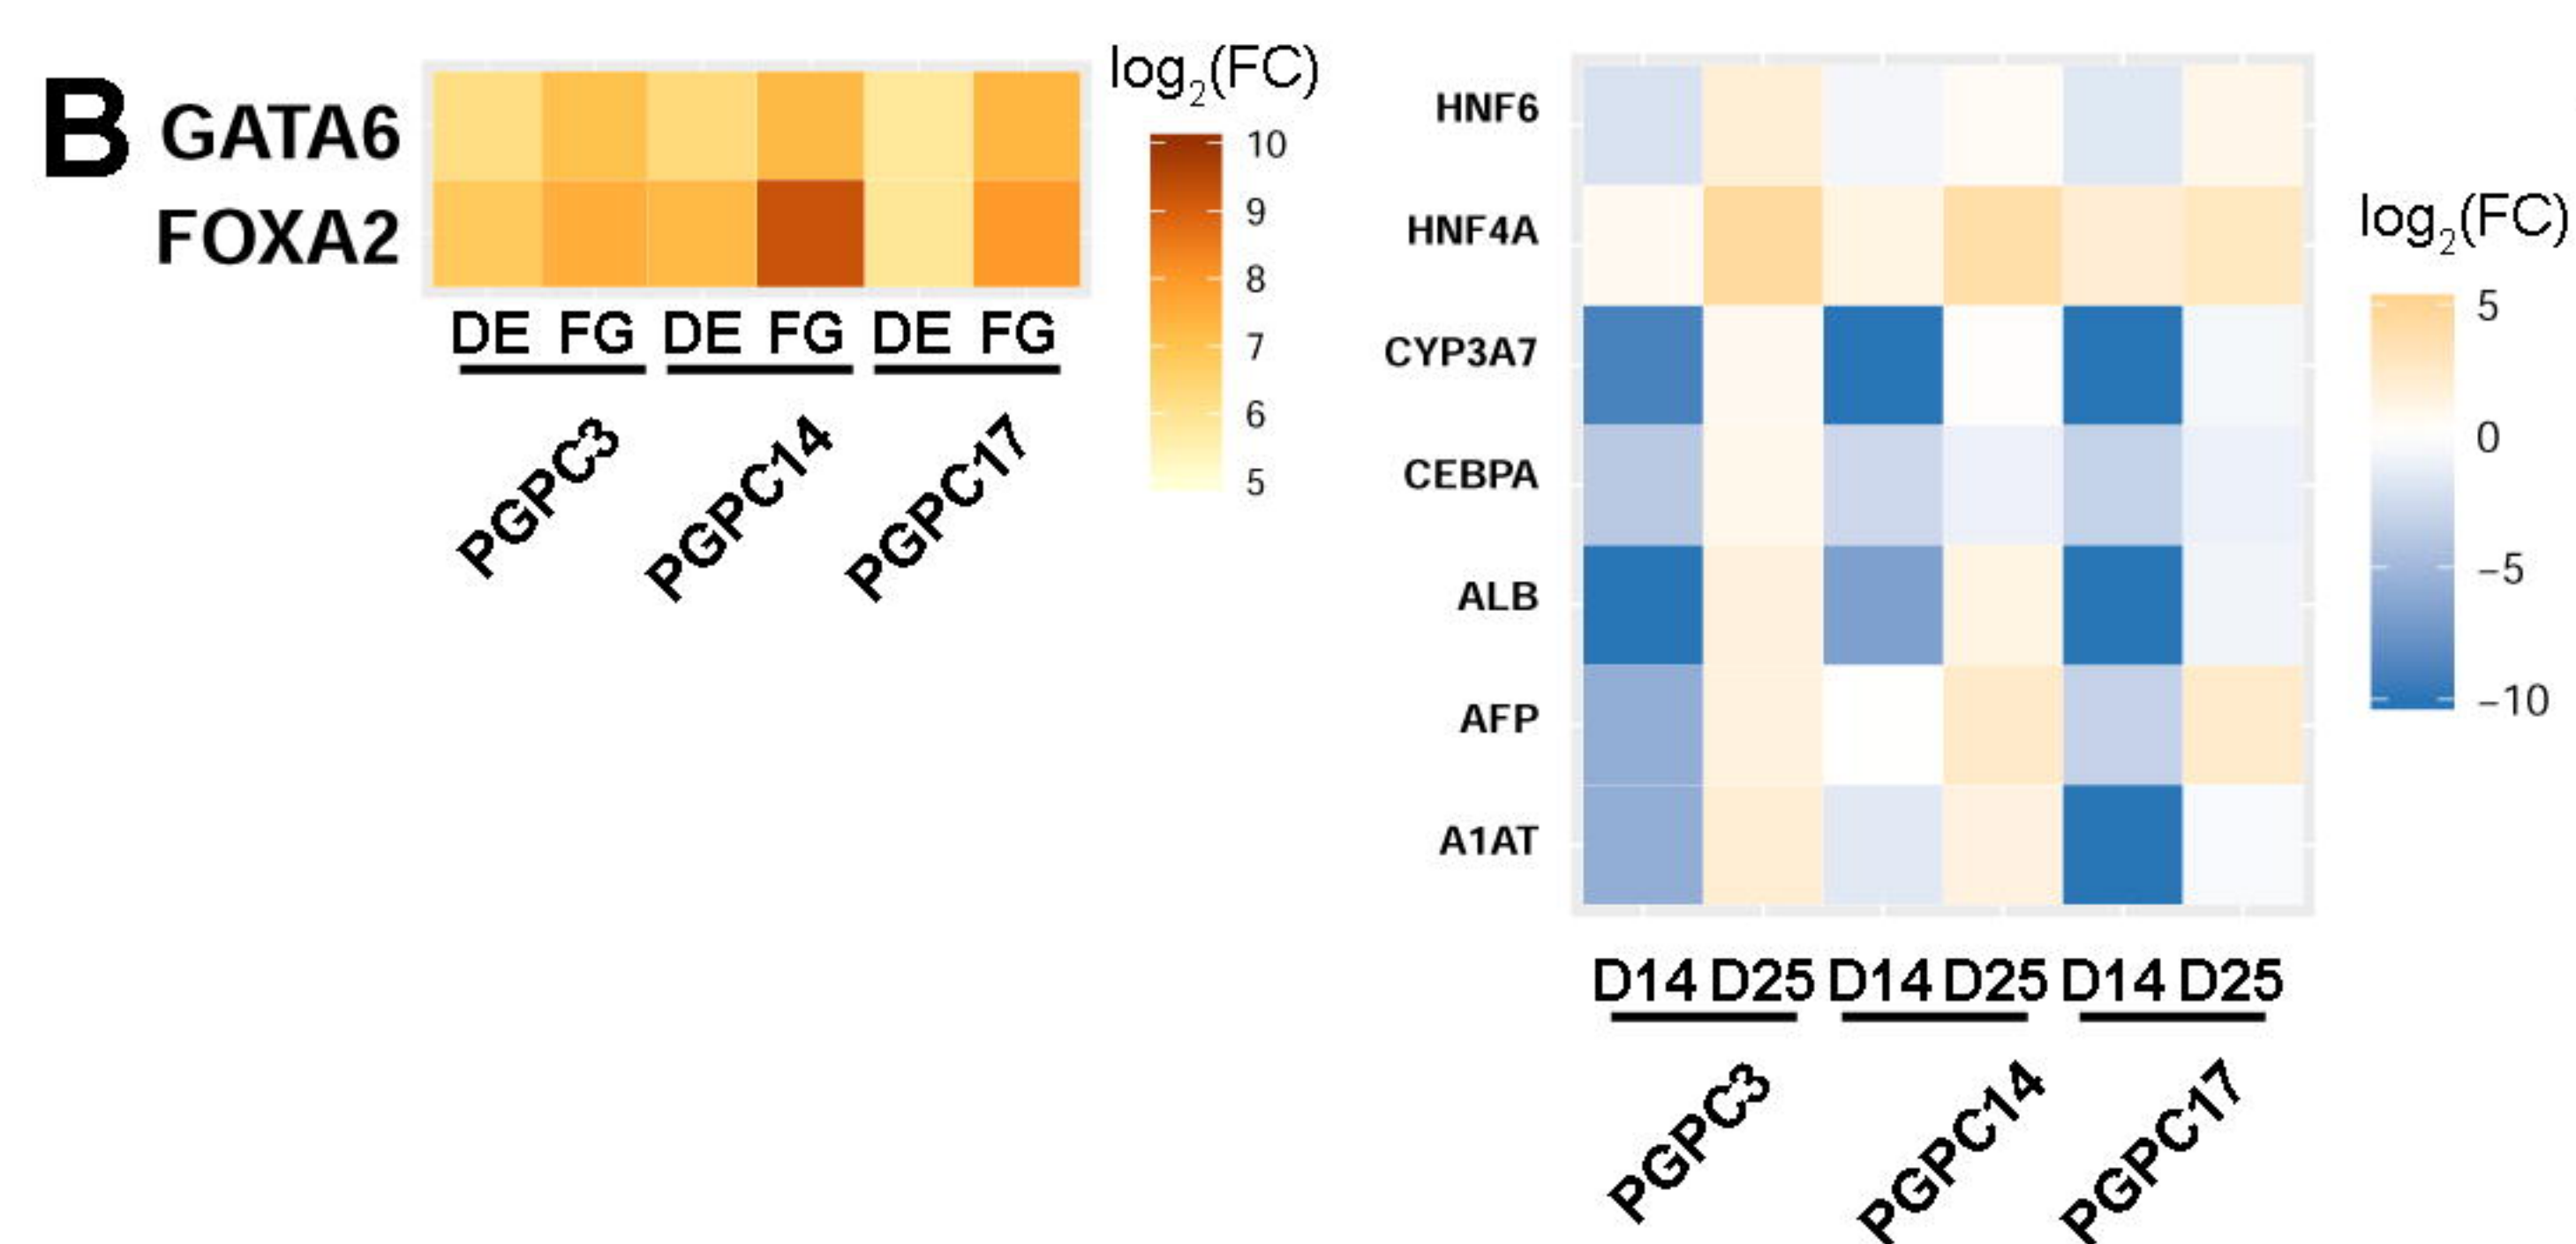

**C**

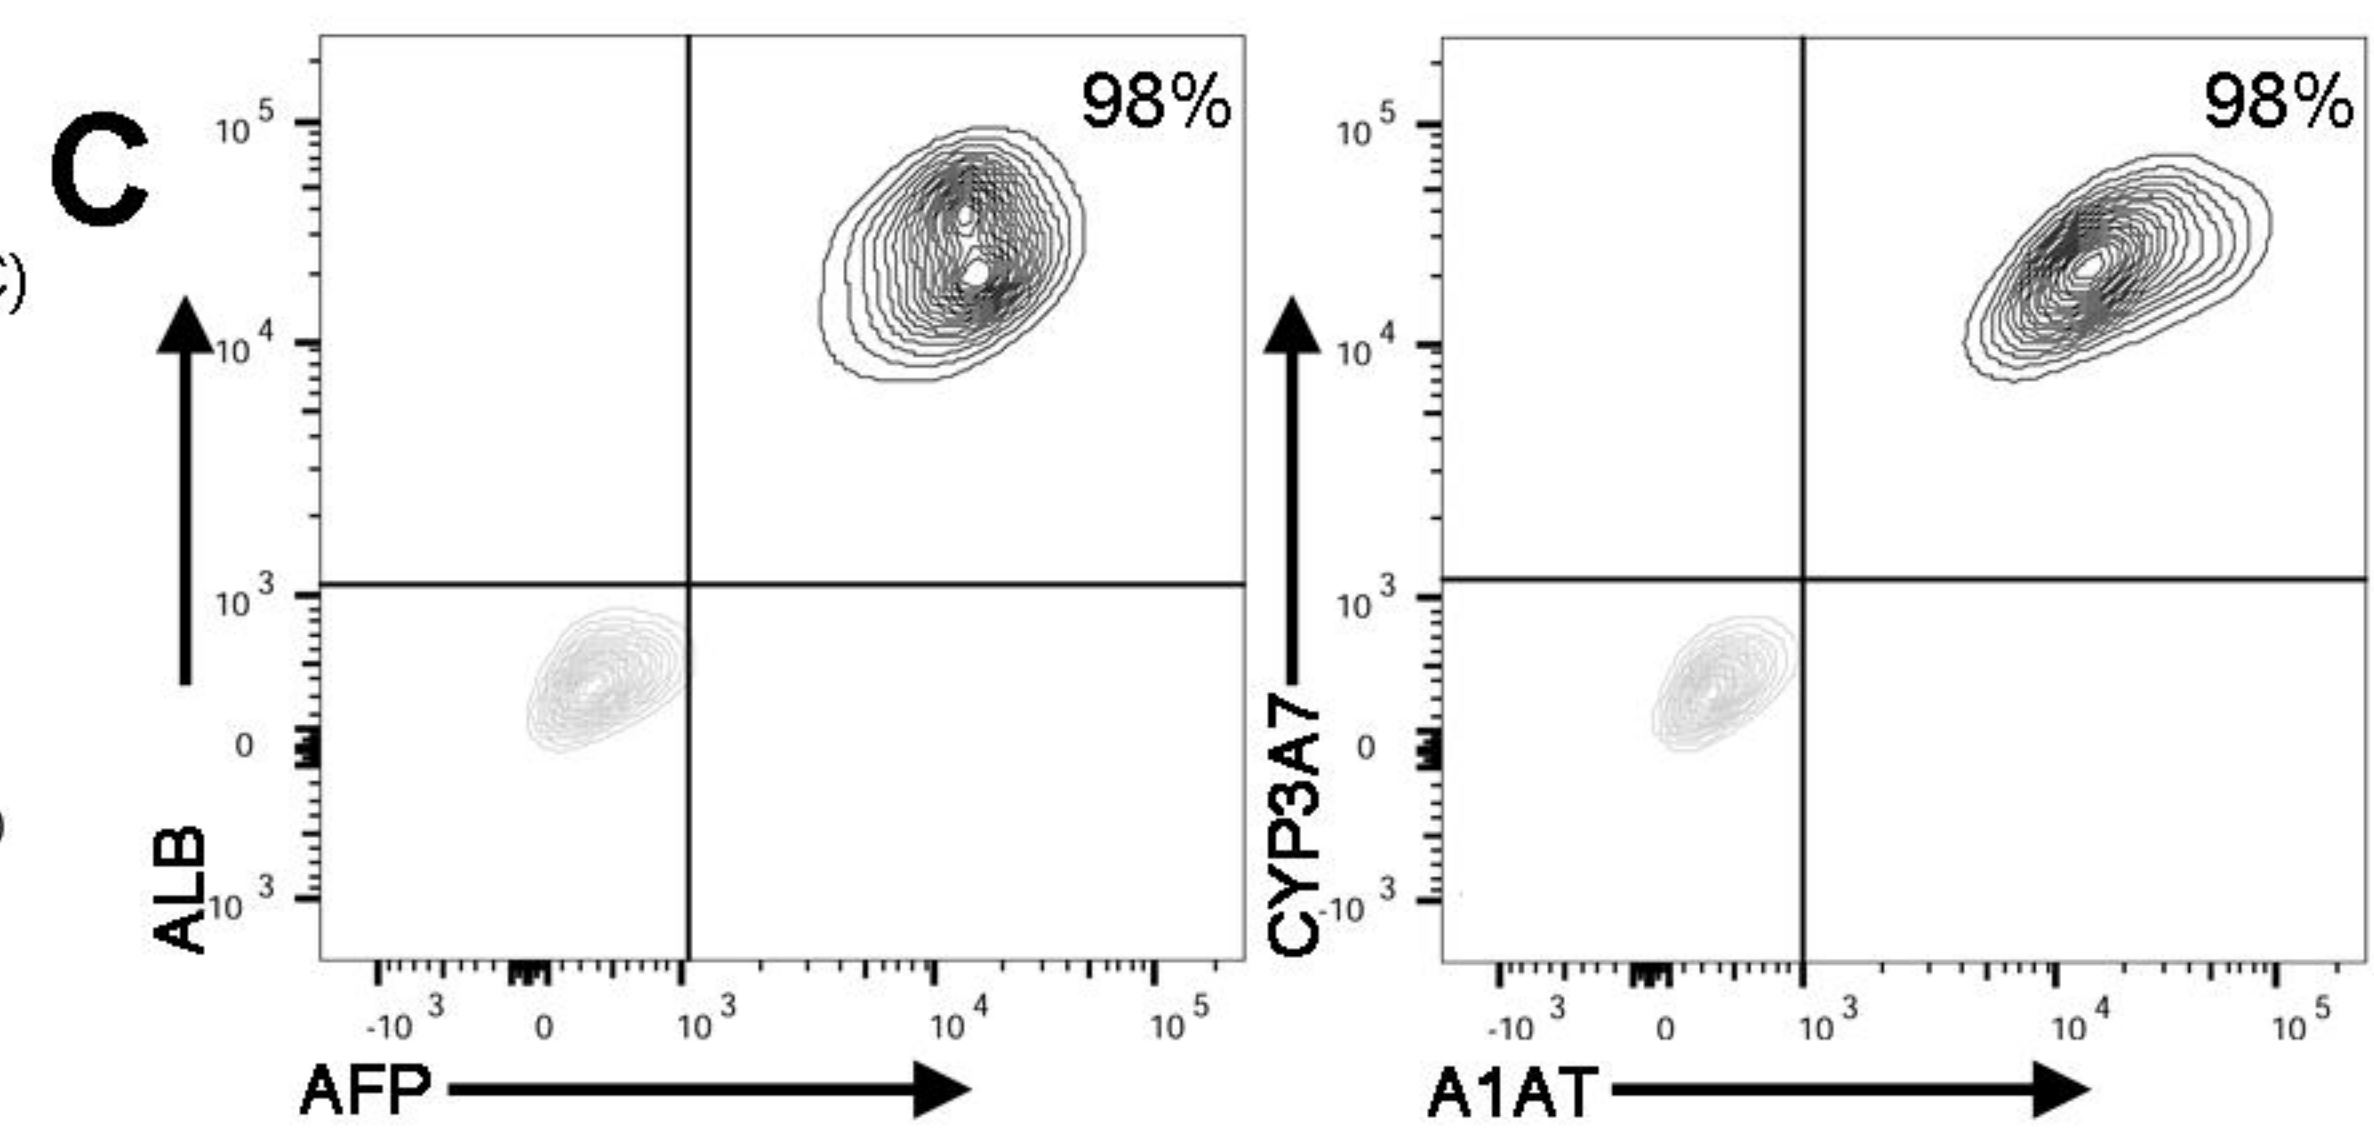

**D**

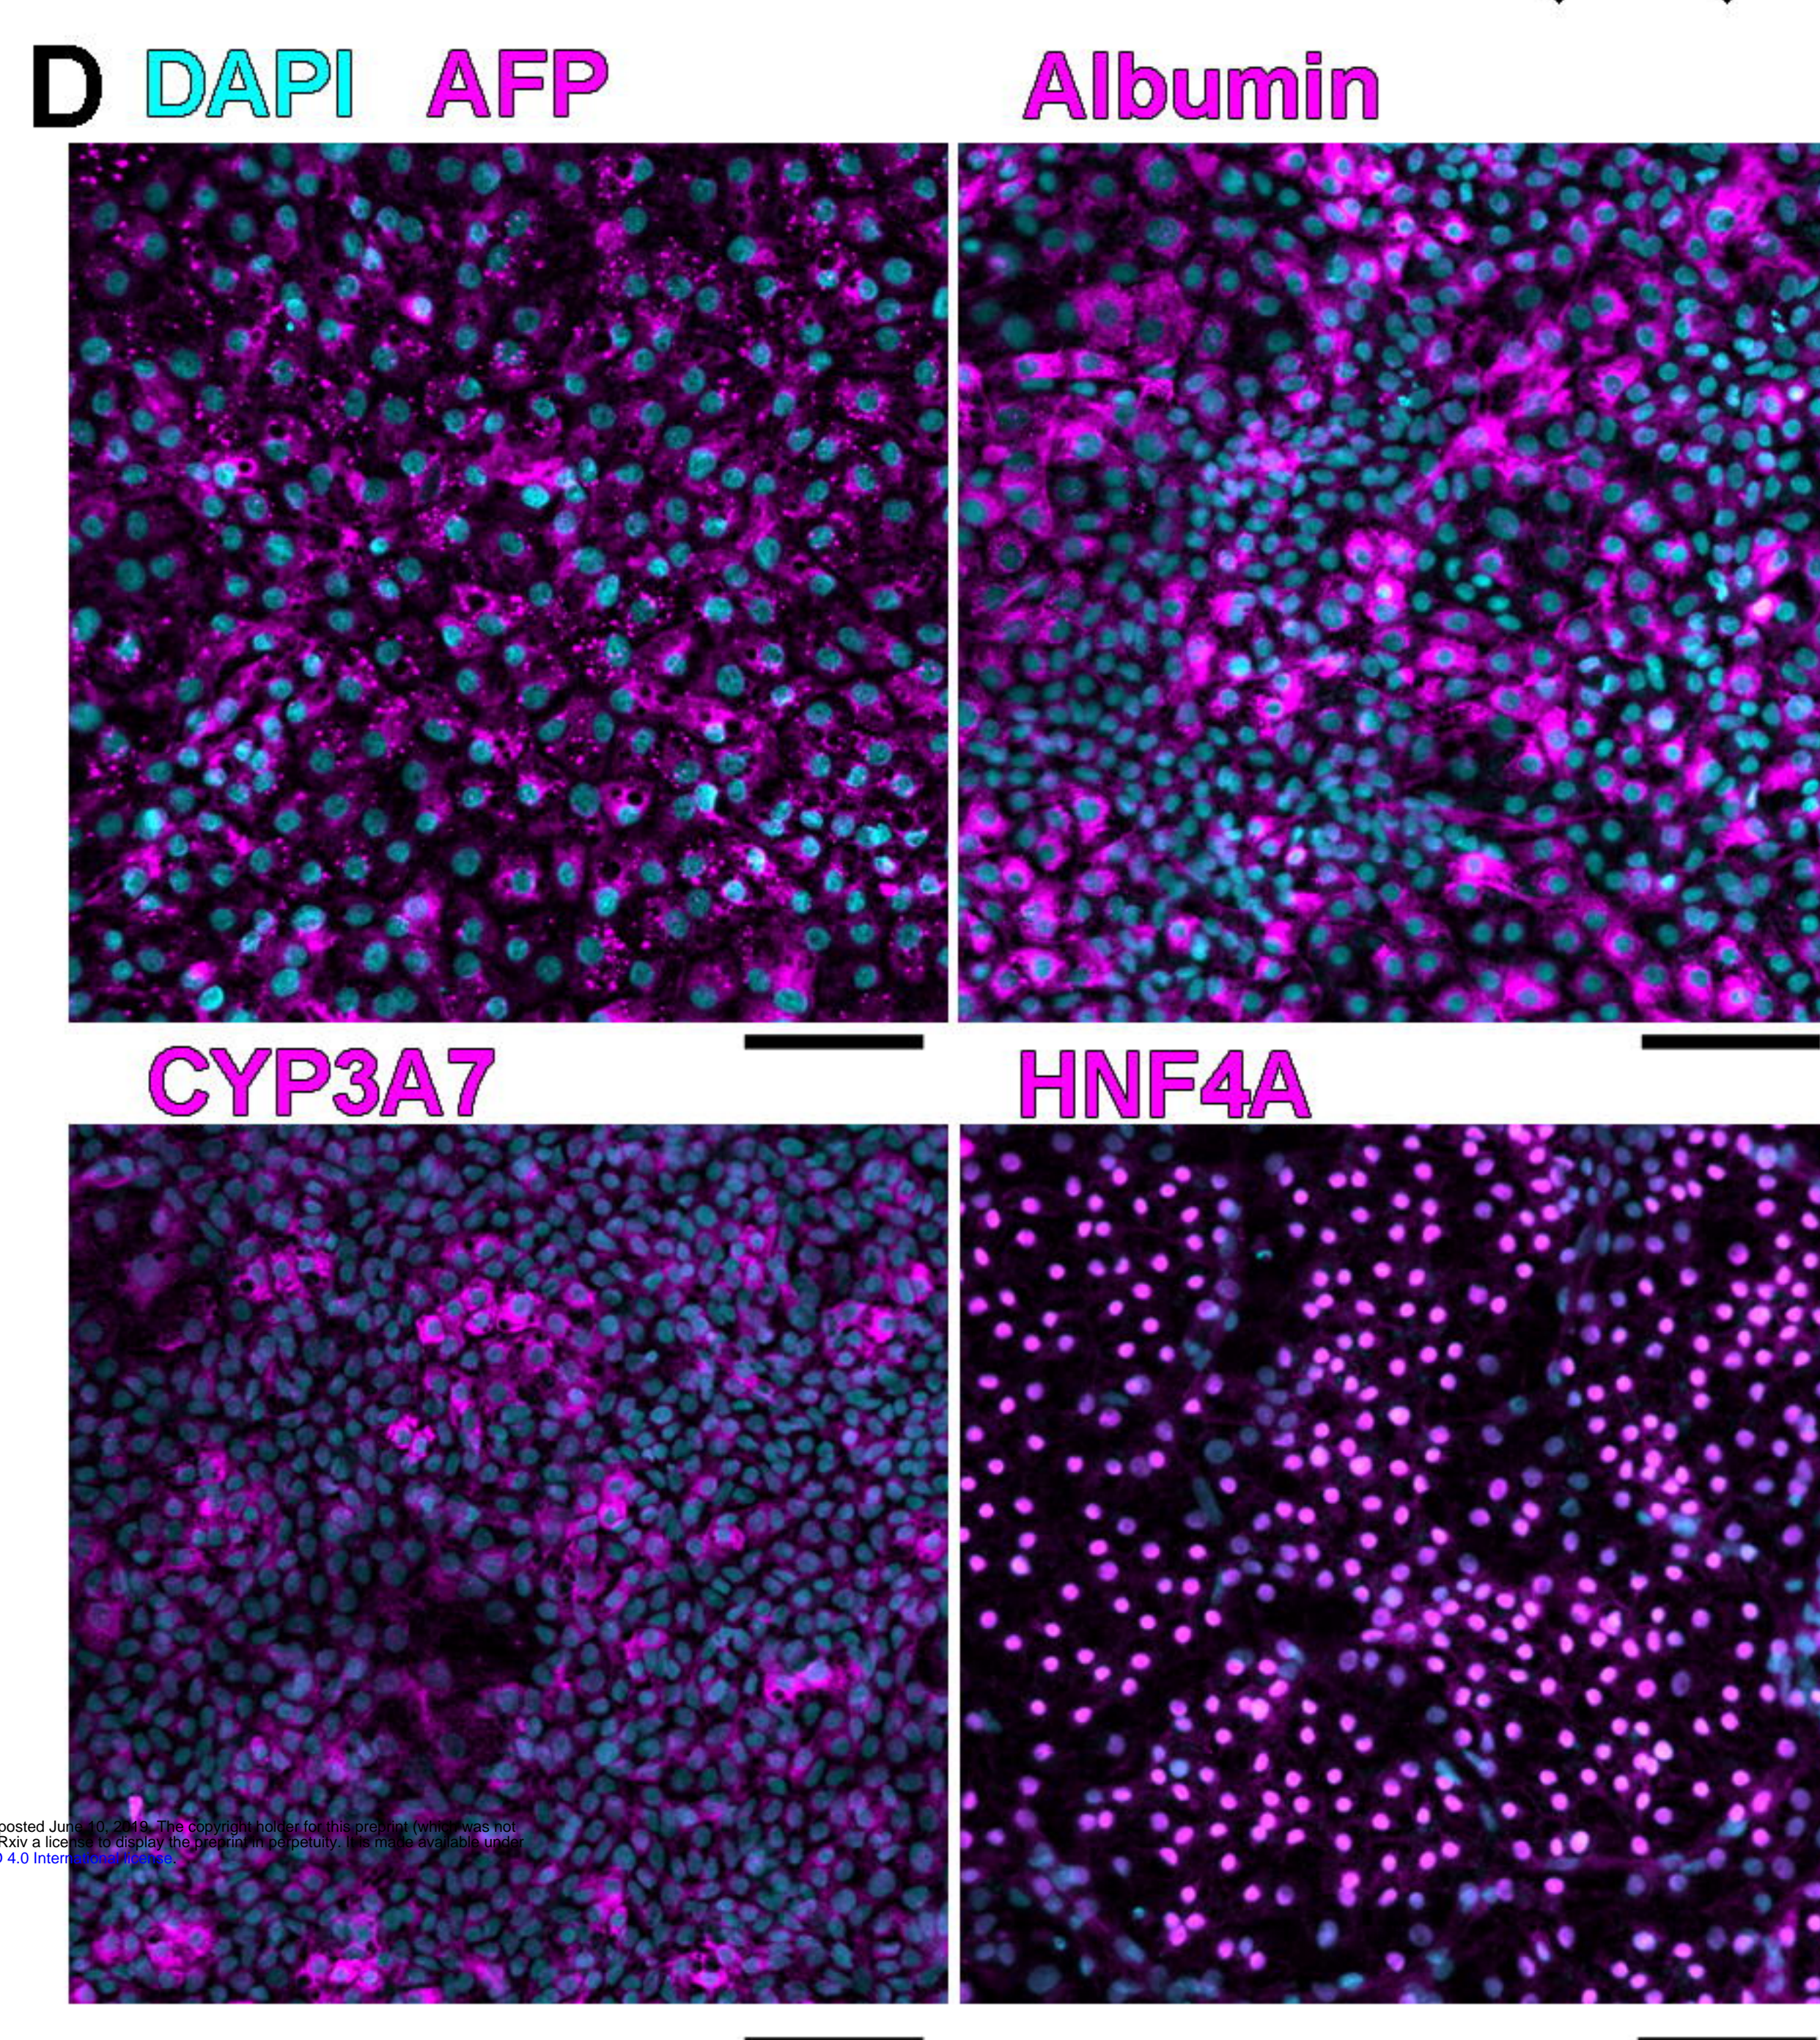

**E**

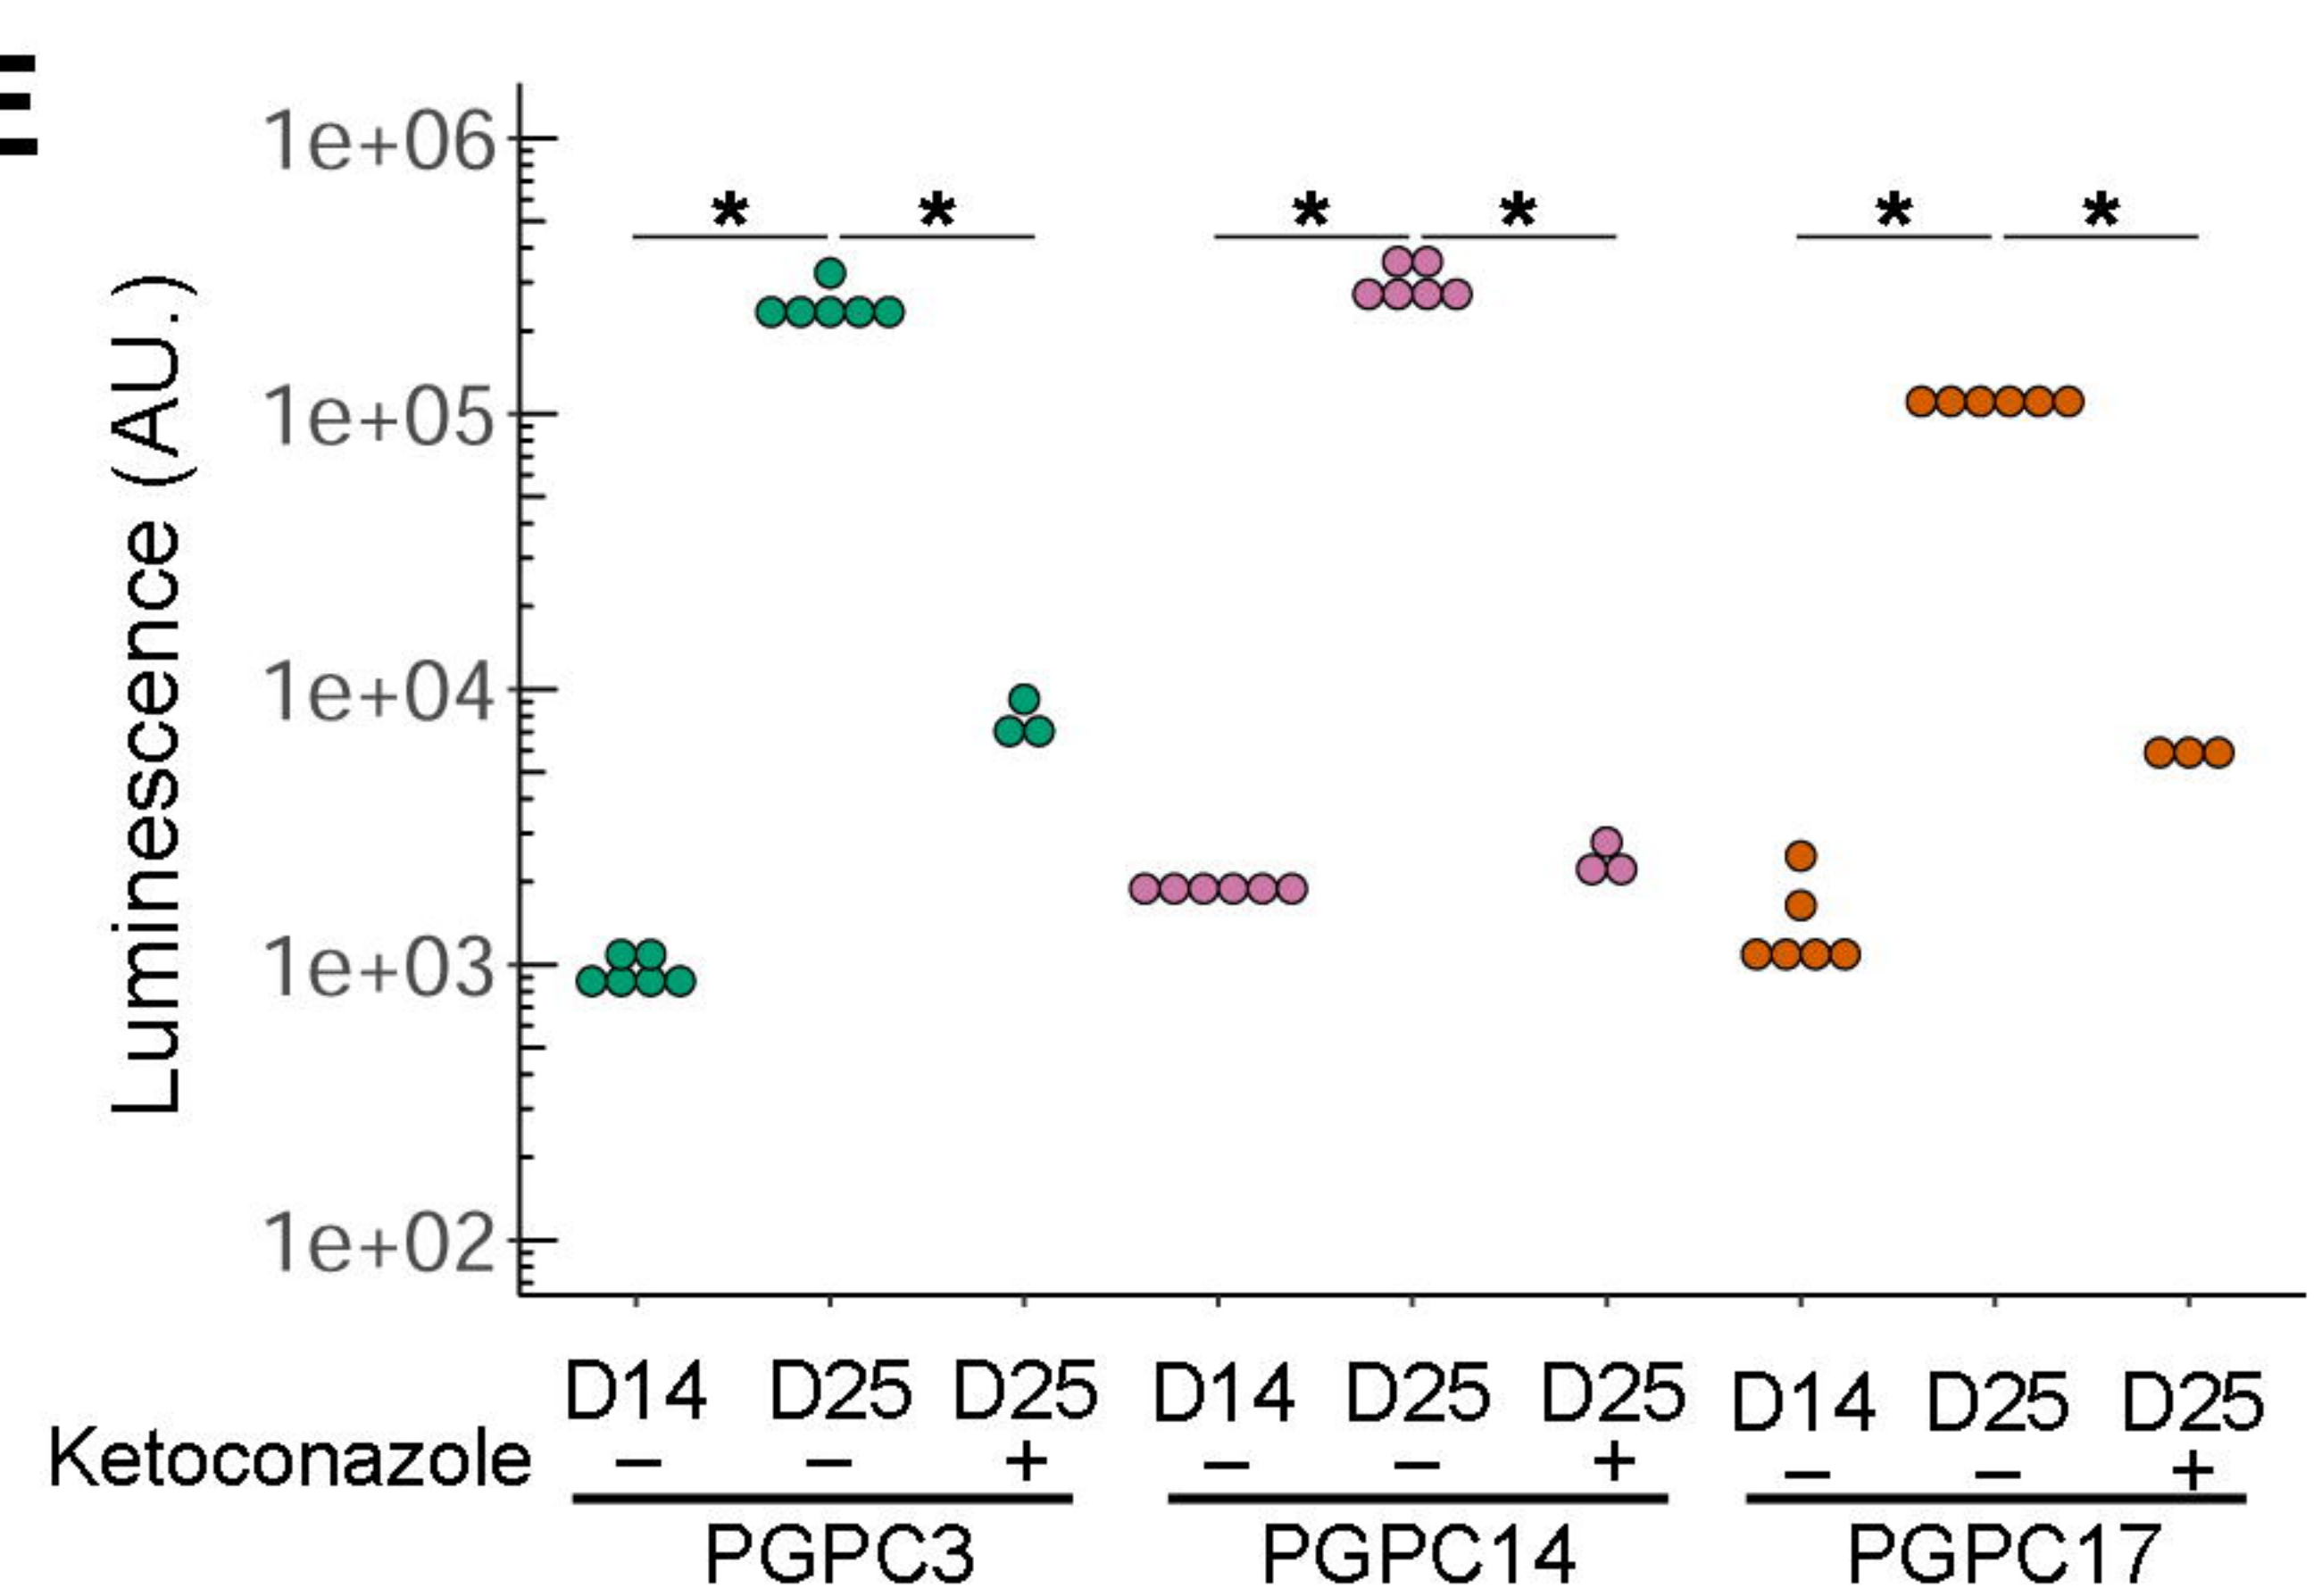

Figure 4

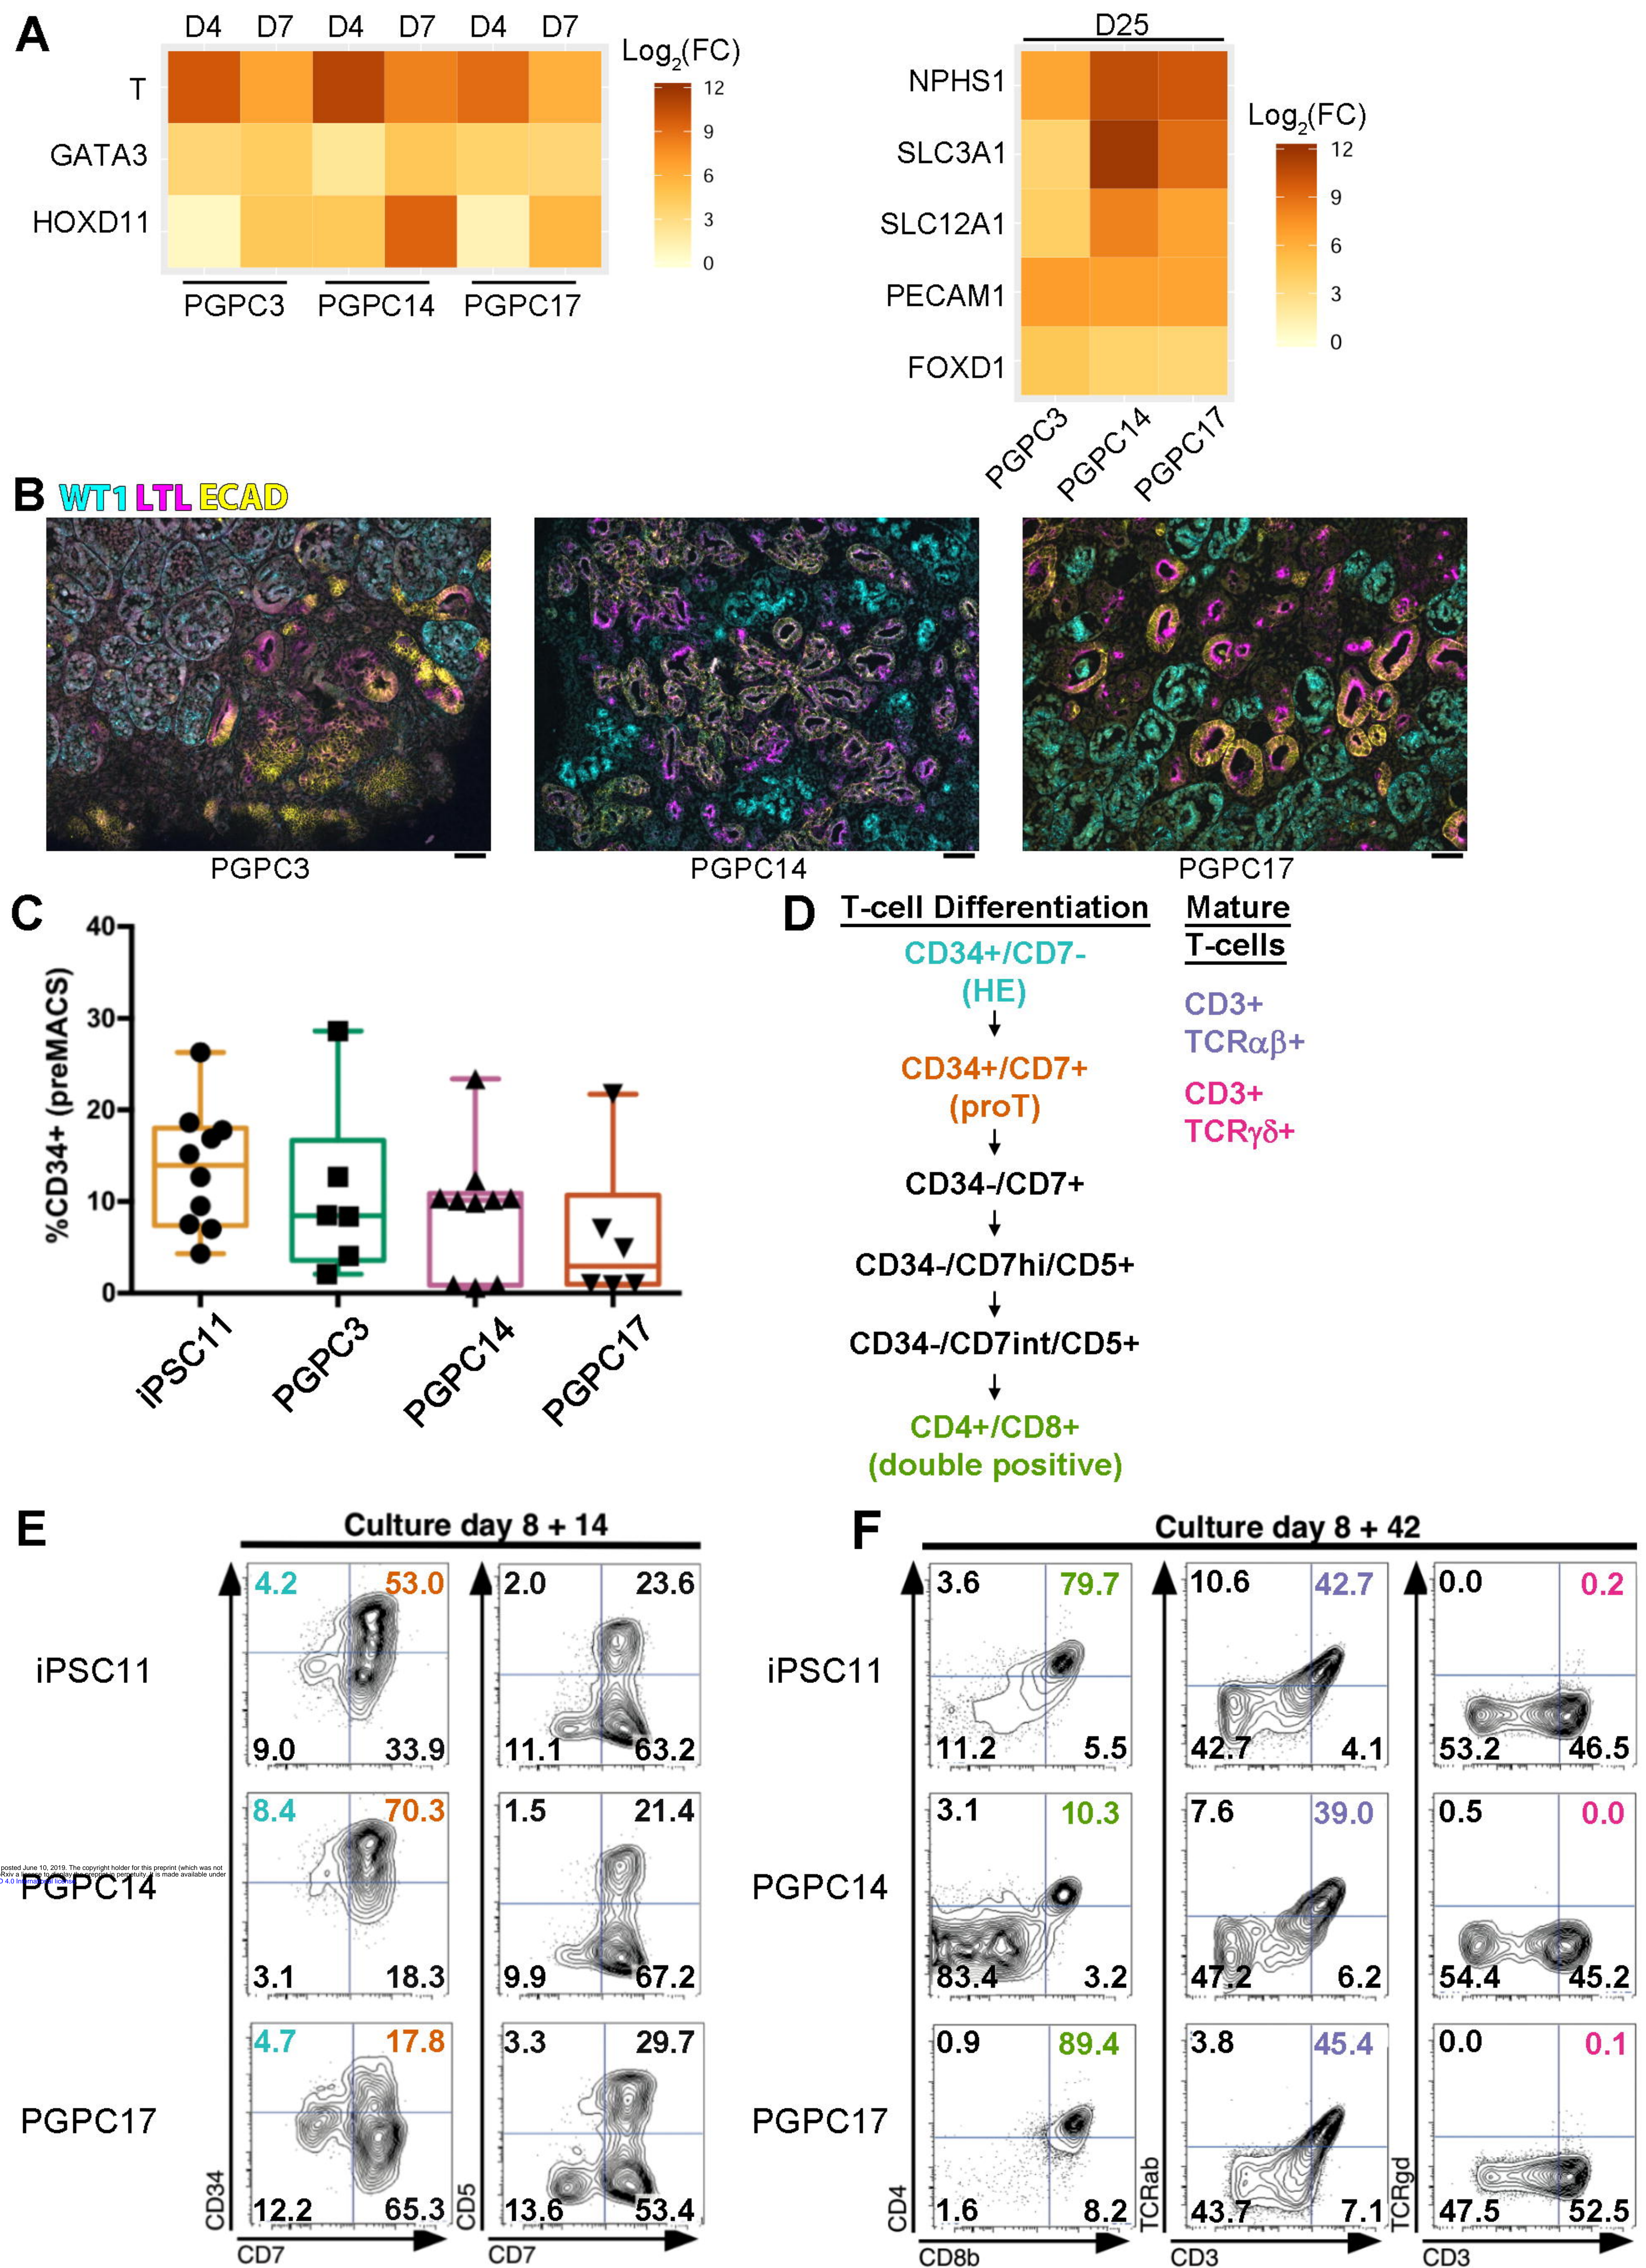

Figure 5

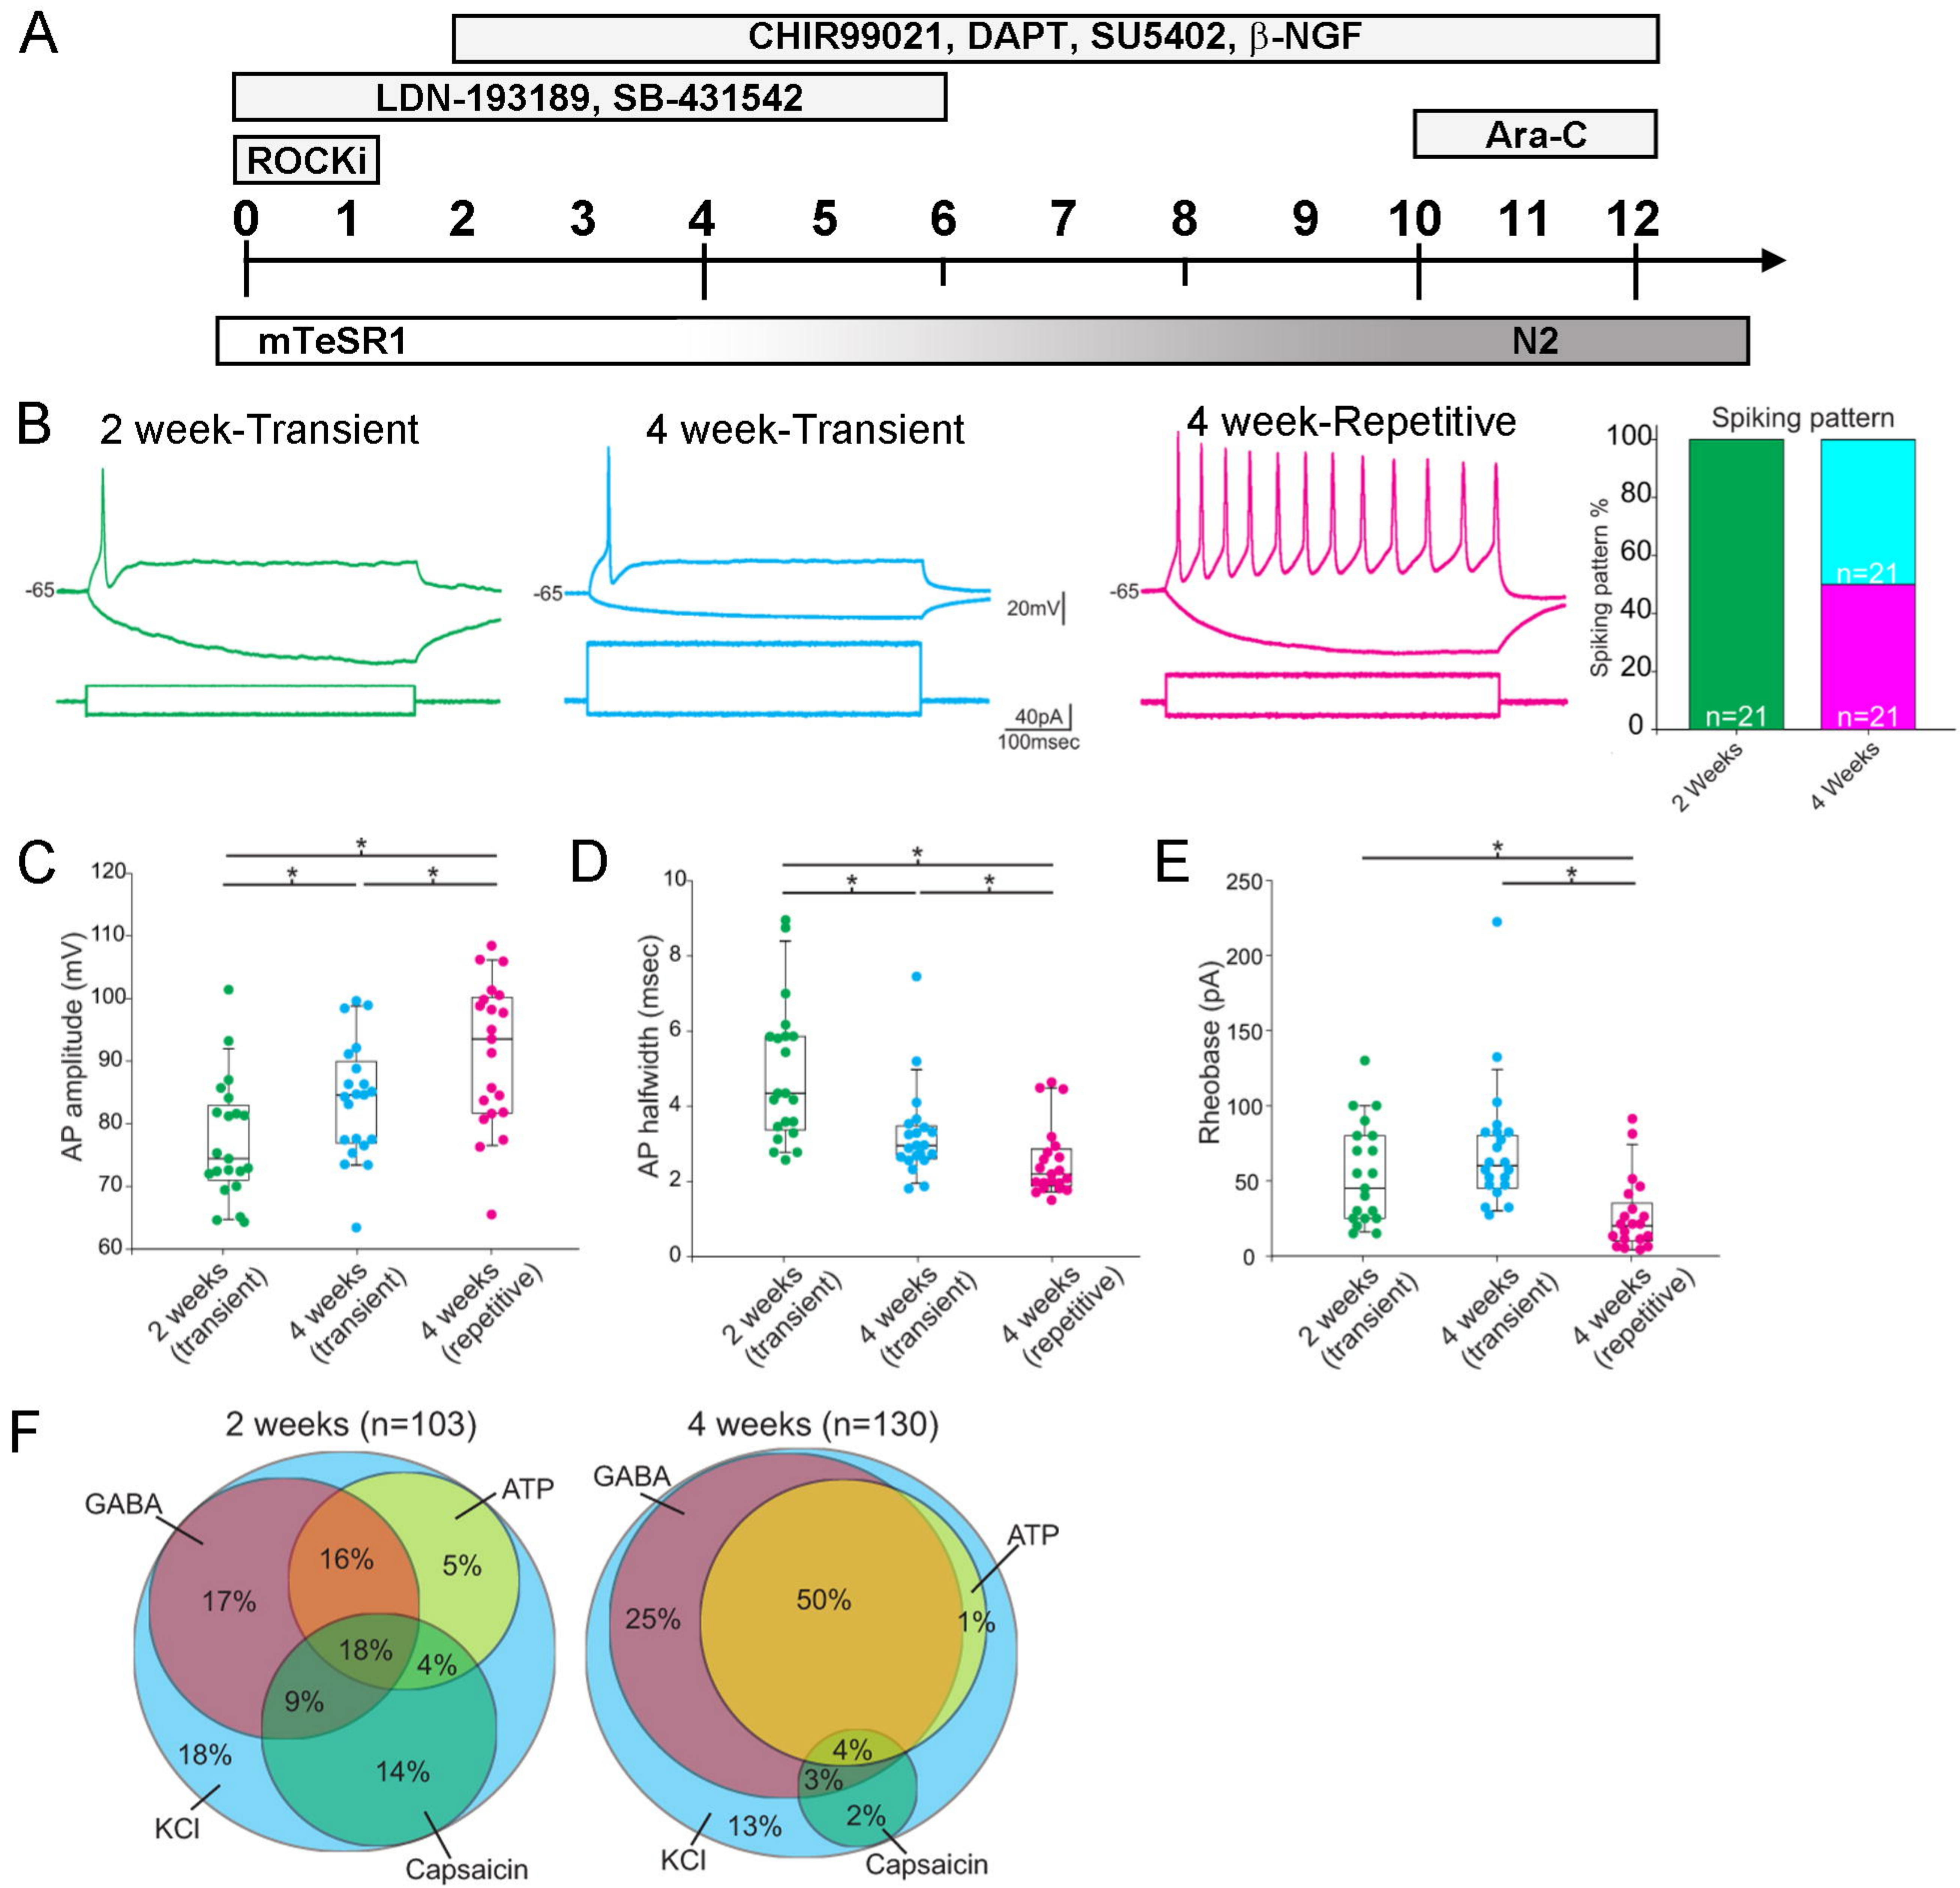

Figure 6

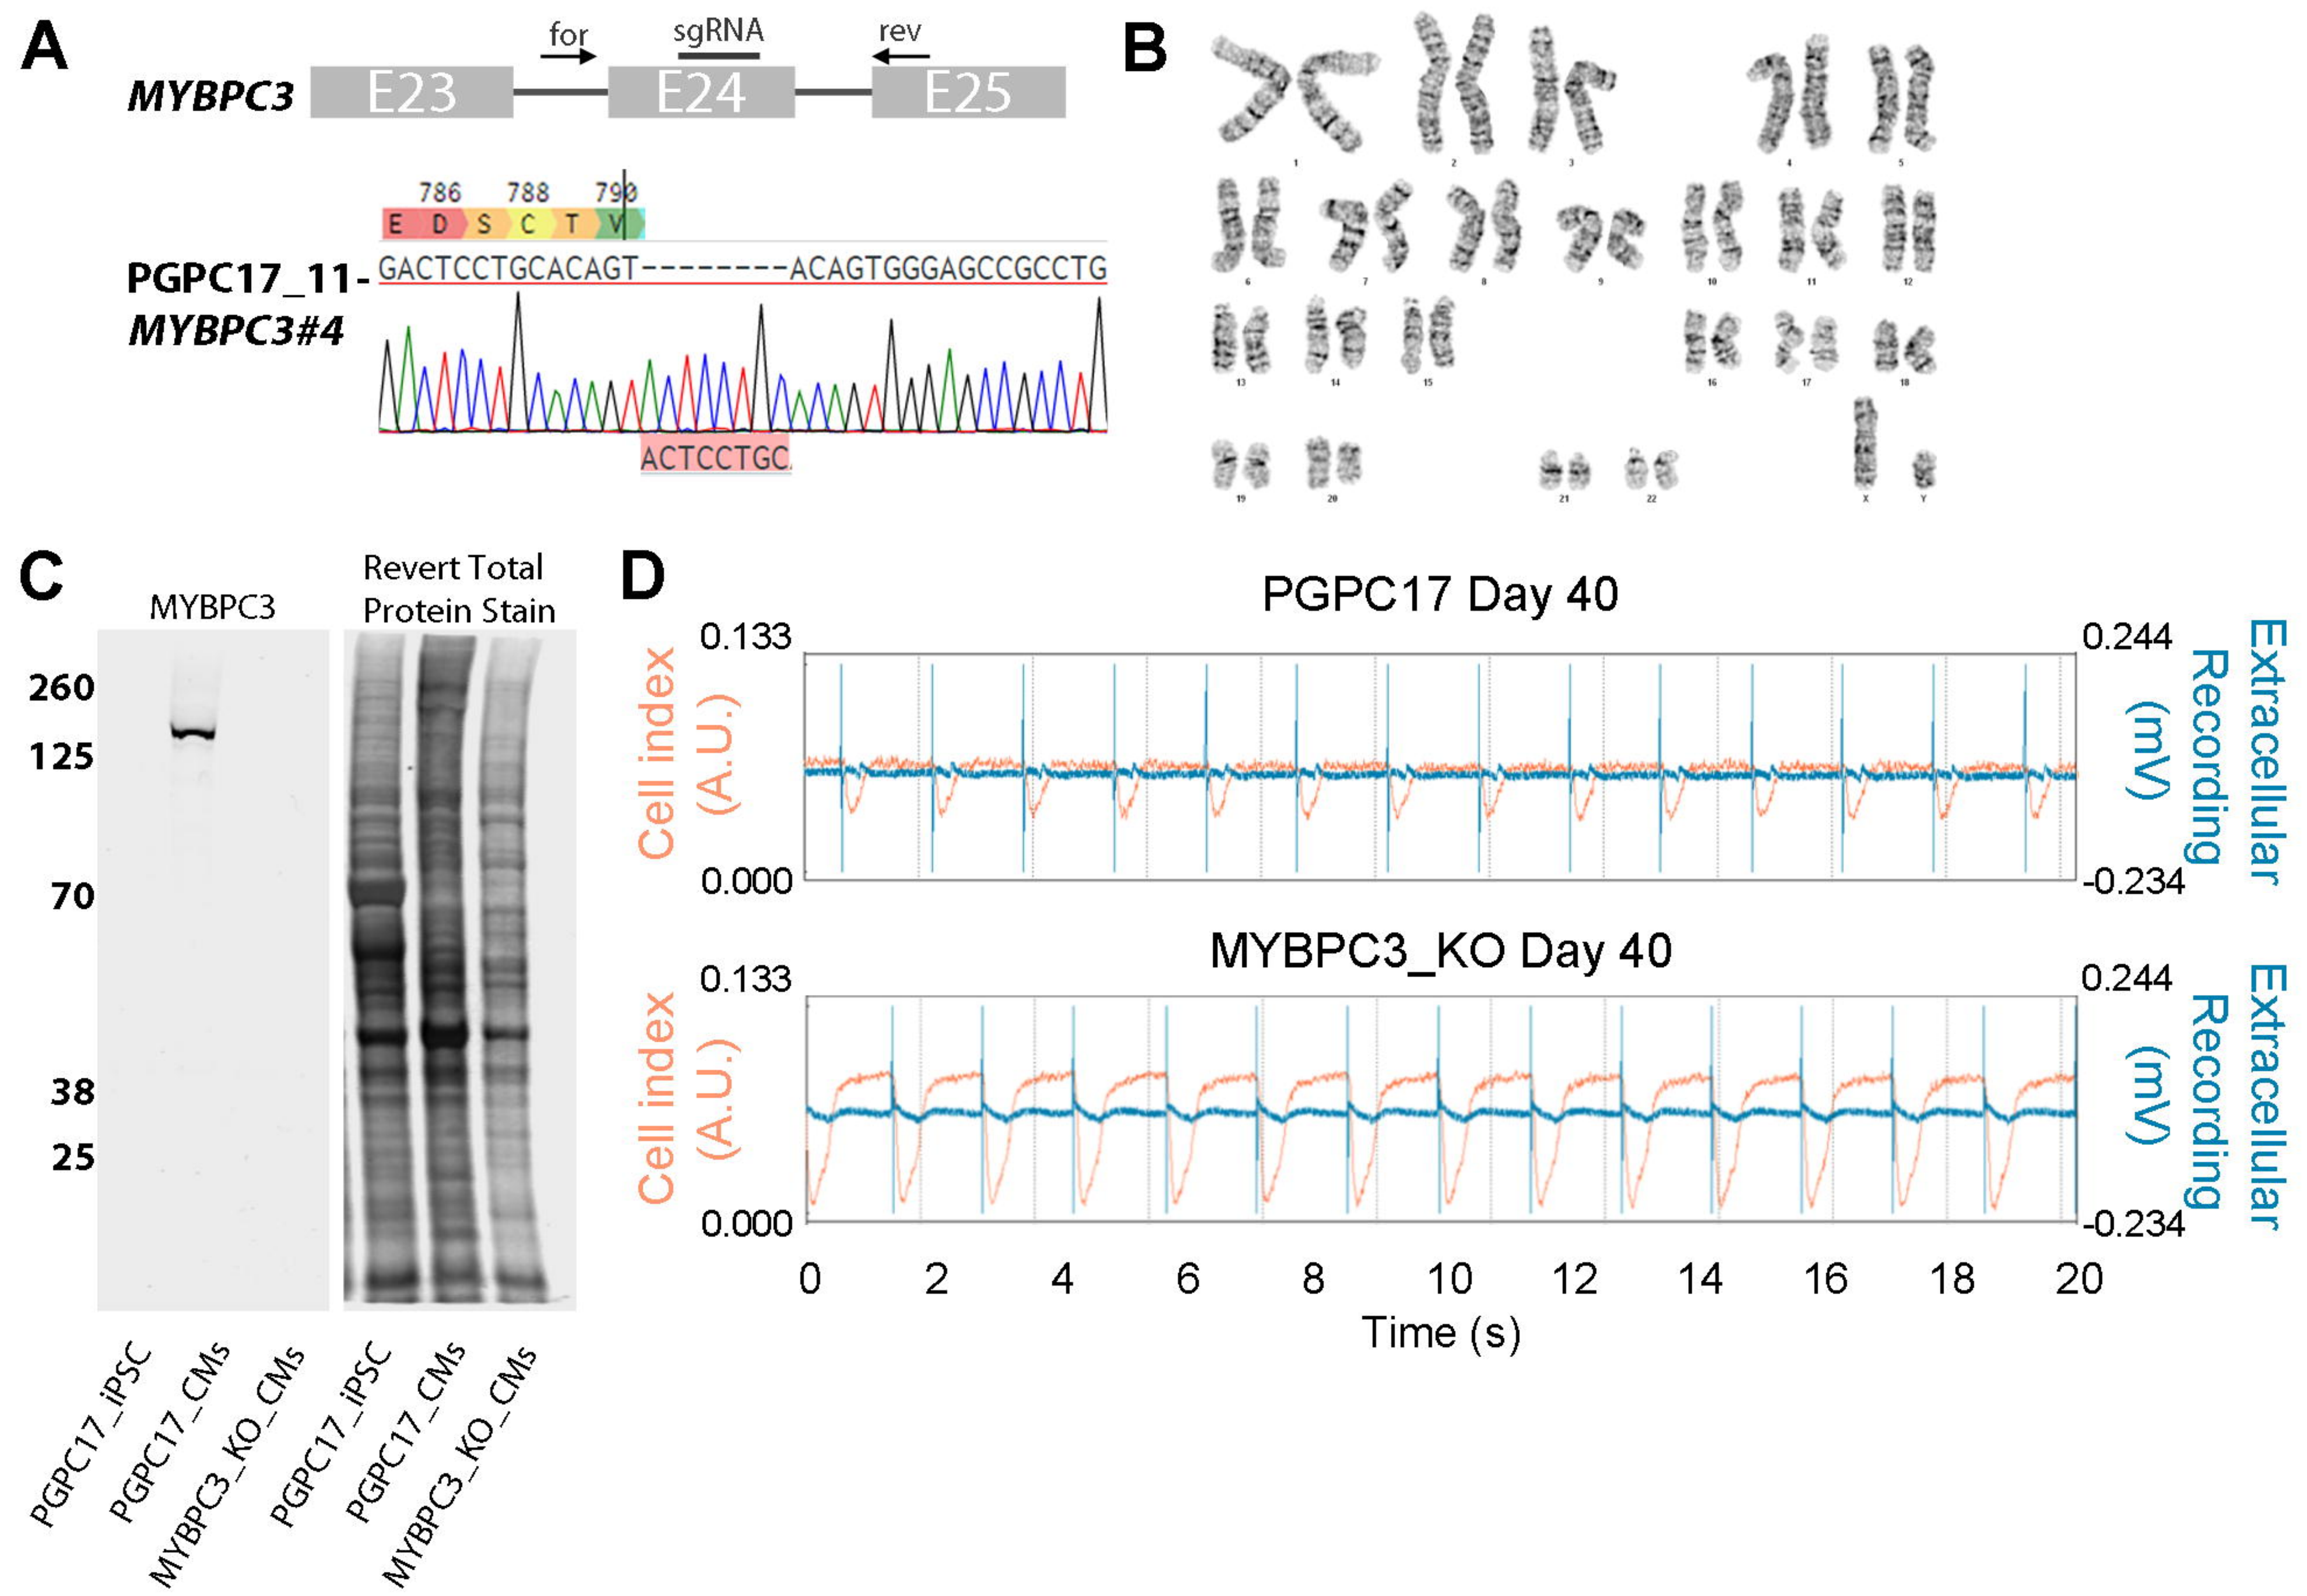

Source: http://biorxiv.org/content/10.1101/666560v1.full.pdf
